# Supplementary material
Source: PubMed Central journal article supplement (PMC4207878)

# Somatic Mutations Predict Poor Outcome in Myelodysplastic Syndrome Patients after Hematopoietic Stem Cell Transplantation

Bejar, et al

## Supplementary Tables and Figures

**Supplemental Table 1:** Summary of transplant regimens received by patients in the cohort.

| Protocol Type | N  | Conditioning Regimen | Stem Cell Source* | GVHD Prophylaxis  | NOTES        |
|---------------|----|----------------------|-------------------|-------------------|--------------|
| RIC           | 35 | Flu-Bu               | PBSC              | Tac-Mtx-Rap       |              |
| RIC           | 7  | Flu-Bu               | PBSC              | Tac-Mtx           | GVAX Vaccine |
| RIC           | 2  | Flu-Bu               | PBSC              | Rap-Tac-Mtx       |              |
| RIC           | 1  | Flu-Bu               | PBSC              | Tac-Mtx           | CD8-depleted |
| RIC           | 3  | Flu-Bu               | PBSC              | Tac-Rap-Vel       |              |
| RIC           | 2  | Flu-Bu               | PBSC              | Rap-MMF           |              |
| Full          | 9  | Cy-TBI               | BM vs.PBSC        | Tac-Mtx           | ATG in some  |
| Full          | 10 | Cy-TBI               | PBSC              | Variable          | Off study**  |
| Full          | 6  | Cy-TBI               | PBSC (or BM)      | Rap-Tac           |              |
| Full          | 4  | Cy-TBI               | PBSC (or BM)      | Tac-Mtx           |              |
| Full          | 3  | Cy-TBI               | PBSC              | Tac-(Rap vs. Mtx) |              |
| Full          | 2  | Bu-Cy                | PBSC (or BM)      | Tac-Mtx           |              |
| Full          | 2  | Cy-TBI               | PBSC              | Tac-Mtx-Rap       |              |
| Full          | 1  | Cy-TBI               | PBSC              | Rap-Tac           |              |

\* The term "vs." indicates that patients were randomized to one of two options. The term (or BM) indicates that PBSC was the default, but BM was acceptable if preferred by the donor.

\*\* These patients were not transplanted as part of a clinical trial.

**Abbreviations:** **N**-number of patients in each group, **RIC**-reduced intensity conditioning, **Full**-full intensity conditioning, **GVHD**-graft versus host disease, **Flu**-fludarabine, **Bu**-busulfan, **Cy**-Cyclophosphamide, **TBI**-total body irradiation, **ATG**-anti-thymocyte globulin, **PBSC**-peripheral blood stem cells, **BM**-bone marrow, **Rap**-rapamycin, **Tac**-tacrolimus, **Mtx**-methotrexate, **MMF**- mycophenolate mofetil.

**Supplemental Table 2:** A) Selected target regions included coding exons of recurrently mutated genes plus an additional 10 nucleotides on either side to encompass consensus splicing sequences. B) Coordinates and ID of SNPs used for fingerprint genotyping.

| Chromosome | Coordinate Start | Coordinate End | Gene Name     | Exon # |
|------------|------------------|----------------|---------------|--------|
| chr1       | 43814924         | 43815040       | <i>MPL</i>    | e10    |
| chr1       | 115251142        | 115251281      | <i>NRAS</i>   | e5     |
| chr1       | 115252180        | 115252359      | <i>NRAS</i>   | e4     |
| chr1       | 115256411        | 115256609      | <i>NRAS</i>   | e3     |
| chr1       | 115258661        | 115258791      | <i>NRAS</i>   | e2     |
| chr2       | 25457138         | 25457299       | <i>DNMT3A</i> | e23    |
| chr2       | 25458566         | 25458704       | <i>DNMT3A</i> | e22    |
| chr2       | 25459795         | 25459884       | <i>DNMT3A</i> | e21    |
| chr2       | 25461989         | 25462094       | <i>DNMT3A</i> | e20    |
| chr2       | 25463161         | 25463329       | <i>DNMT3A</i> | e19    |
| chr2       | 25463499         | 25463609       | <i>DNMT3A</i> | e18    |
| chr2       | 25464421         | 25464586       | <i>DNMT3A</i> | e17    |
| chr2       | 25466757         | 25466861       | <i>DNMT3A</i> | e16    |
| chr2       | 25467014         | 25467217       | <i>DNMT3A</i> | e15    |
| chr2       | 25467399         | 25467531       | <i>DNMT3A</i> | e14    |
| chr2       | 25468112         | 25468211       | <i>DNMT3A</i> | e13    |
| chr2       | 25468879         | 25468943       | <i>DNMT3A</i> | e12    |
| chr2       | 25469019         | 25469188       | <i>DNMT3A</i> | e11    |
| chr2       | 25469479         | 25469655       | <i>DNMT3A</i> | e10    |
| chr2       | 25469910         | 25470037       | <i>DNMT3A</i> | e9     |
| chr2       | 25470450         | 25470628       | <i>DNMT3A</i> | e8     |
| chr2       | 25470896         | 25471131       | <i>DNMT3A</i> | e7     |
| chr2       | 25497800         | 25497966       | <i>DNMT3A</i> | e6     |
| chr2       | 25498359         | 25498422       | <i>DNMT3A</i> | e5     |
| chr2       | 25505300         | 25505590       | <i>DNMT3A</i> | e4     |
| chr2       | 25522998         | 25523122       | <i>DNMT3A</i> | e3     |
| chr2       | 25536772         | 25536863       | <i>DNMT3A</i> | e2     |
| chr2       | 198257017        | 198257195      | <i>SF3B1</i>  | e25    |
| chr2       | 198257686        | 198257922      | <i>SF3B1</i>  | e24    |
| chr2       | 198260770        | 198261062      | <i>SF3B1</i>  | e23    |
| chr2       | 198262699        | 198262850      | <i>SF3B1</i>  | e22    |
| chr2       | 198263175        | 198263315      | <i>SF3B1</i>  | e21    |
| chr2       | 198264769        | 198264900      | <i>SF3B1</i>  | e20    |
| chr2       | 198264966        | 198265168      | <i>SF3B1</i>  | e19    |
| chr2       | 198265429        | 198265670      | <i>SF3B1</i>  | e18    |
| chr2       | 198266114        | 198266259      | <i>SF3B1</i>  | e17    |
| chr2       | 198266456        | 198266622      | <i>SF3B1</i>  | e16    |
| chr2       | 198266699        | 198266864      | <i>SF3B1</i>  | e15    |
| chr2       | 198267270        | 198267560      | <i>SF3B1</i>  | e14    |
| chr2       | 198267663        | 198267769      | <i>SF3B1</i>  | e13    |
| chr2       | 198268299        | 198268498      | <i>SF3B1</i>  | e12    |
| chr2       | 198269790        | 198269911      | <i>SF3B1</i>  | e11    |
| chr2       | 198269989        | 198270206      | <i>SF3B1</i>  | e10    |
| chr2       | 198272712        | 198272853      | <i>SF3B1</i>  | e9     |
| chr2       | 198273083        | 198273315      | <i>SF3B1</i>  | e8     |
| chr2       | 198274484        | 198274741      | <i>SF3B1</i>  | e7     |
| chr2       | 198281455        | 198281645      | <i>SF3B1</i>  | e6     |
| chr2       | 198283223        | 198283322      | <i>SF3B1</i>  | e5     |
| chr2       | 198285142        | 198285276      | <i>SF3B1</i>  | e4     |
| chr2       | 198285743        | 198285867      | <i>SF3B1</i>  | e3     |

| <b>Chromosome</b> | <b>Coordinate Start</b> | <b>Coordinate End</b> | <b>Gene Name</b> | <b>Exon #</b> |
|-------------------|-------------------------|-----------------------|------------------|---------------|
| chr2              | 198288522               | 198288708             | <i>SF3B1</i>     | e2            |
| chr2              | 198299686               | 198299733             | <i>SF3B1</i>     | e1            |
| chr2              | 209113083               | 209113394             | <i>IDH1</i>      | e4            |
| chr3              | 105438881               | 105439104             | <i>CBLB</i>      | e10           |
| chr3              | 105452843               | 105452994             | <i>CBLB</i>      | e9            |
| chr3              | 128199852               | 128200171             | <i>GATA2</i>     | e6            |
| chr3              | 128200652               | 128200797             | <i>GATA2</i>     | e5            |
| chr3              | 128202693               | 128202858             | <i>GATA2</i>     | e4            |
| chr3              | 128204560               | 128205221             | <i>GATA2</i>     | e3            |
| chr3              | 128205636               | 128205884             | <i>GATA2</i>     | e2            |
| chr4              | 55593572                | 55593718              | <i>KIT</i>       | e11           |
| chr4              | 55599226                | 55599368              | <i>KIT</i>       | e17           |
| chr4              | 106155090               | 106158518             | <i>TET2</i>      | e3            |
| chr4              | 106162486               | 106162596             | <i>TET2</i>      | e4            |
| chr4              | 106163981               | 106164094             | <i>TET2</i>      | e5            |
| chr4              | 106164717               | 106164945             | <i>TET2</i>      | e6            |
| chr4              | 106180766               | 106180936             | <i>TET2</i>      | e7            |
| chr4              | 106182906               | 106183015             | <i>TET2</i>      | e8            |
| chr4              | 106190757               | 106190914             | <i>TET2</i>      | e9            |
| chr4              | 106193711               | 106194085             | <i>TET2</i>      | e10           |
| chr4              | 106196195               | 106197686             | <i>TET2</i>      | e11           |
| chr5              | 170834694               | 170834788             | <i>NPM1</i>      | e10           |
| chr5              | 170837521               | 170837579             | <i>NPM1</i>      | e11           |
| chr7              | 139044998               | 139045078             | <i>LUC7L2</i>    | e1            |
| chr7              | 139060798               | 139060912             | <i>LUC7L2</i>    | e2            |
| chr7              | 139083335               | 139083453             | <i>LUC7L2</i>    | e3            |
| chr7              | 139086873               | 139087003             | <i>LUC7L2</i>    | e4            |
| chr7              | 139090380               | 139090543             | <i>LUC7L2</i>    | e5            |
| chr7              | 139091910               | 139092106             | <i>LUC7L2</i>    | e6            |
| chr7              | 139094299               | 139094410             | <i>LUC7L2</i>    | e7            |
| chr7              | 139097287               | 139097336             | <i>LUC7L2</i>    | e8            |
| chr7              | 139102274               | 139102485             | <i>LUC7L2</i>    | e9            |
| chr7              | 139106899               | 139107096             | <i>LUC7L2</i>    | e10           |
| chr7              | 140453065               | 140453203             | <i>BRAF</i>      | e15           |
| chr7              | 148504728               | 148504808             | <i>EZH2</i>      | e20           |
| chr7              | 148506153               | 148506257             | <i>EZH2</i>      | e19           |
| chr7              | 148506392               | 148506492             | <i>EZH2</i>      | e18           |
| chr7              | 148507415               | 148507516             | <i>EZH2</i>      | e17           |
| chr7              | 148508707               | 148508822             | <i>EZH2</i>      | e16           |
| chr7              | 148511041               | 148511239             | <i>EZH2</i>      | e15           |
| chr7              | 148511996               | 148512141             | <i>EZH2</i>      | e14           |
| chr7              | 148512588               | 148512648             | <i>EZH2</i>      | e13           |
| chr7              | 148513766               | 148513880             | <i>EZH2</i>      | e12           |
| chr7              | 148514304               | 148514493             | <i>EZH2</i>      | e11           |
| chr7              | 148514959               | 148515219             | <i>EZH2</i>      | e10           |
| chr7              | 148516678               | 148516789             | <i>EZH2</i>      | e9            |
| chr7              | 148523536               | 148523734             | <i>EZH2</i>      | e8            |
| chr7              | 148524246               | 148524368             | <i>EZH2</i>      | e7            |
| chr7              | 148525822               | 148525982             | <i>EZH2</i>      | e6            |
| chr7              | 148526810               | 148526950             | <i>EZH2</i>      | e5            |
| chr7              | 148529716               | 148529852             | <i>EZH2</i>      | e4            |
| chr7              | 148543552               | 148543700             | <i>EZH2</i>      | e3            |
| chr7              | 148544264               | 148544400             | <i>EZH2</i>      | e2            |
| chr9              | 5073688                 | 5073795               | <i>JAK2</i>      | e14           |
| chr11             | 32410594                | 32410735              | <i>WT1</i>       | e10           |

| <b>Chromosome</b> | <b>Coordinate Start</b> | <b>Coordinate End</b> | <b>Gene Name</b> | <b>Exon #</b> |
|-------------------|-------------------------|-----------------------|------------------|---------------|
| chr11             | 32413508                | 32413620              | <i>WT1</i>       | e9            |
| chr11             | 32414202                | 32414311              | <i>WT1</i>       | e8            |
| chr11             | 32417793                | 32417963              | <i>WT1</i>       | e7            |
| chr11             | 32421484                | 32421600              | <i>WT1</i>       | e6            |
| chr11             | 32438026                | 32438096              | <i>WT1</i>       | e5            |
| chr11             | 32439113                | 32439210              | <i>WT1</i>       | e4            |
| chr11             | 32449492                | 32449614              | <i>WT1</i>       | e3            |
| chr11             | 32450033                | 32450175              | <i>WT1</i>       | e2            |
| chr11             | 32456236                | 32456901              | <i>WT1</i>       | e1            |
| chr11             | 85956262                | 85956395              | <i>EED</i>       | e1            |
| chr11             | 85961328                | 85961500              | <i>EED</i>       | e2            |
| chr11             | 85963180                | 85963292              | <i>EED</i>       | e3            |
| chr11             | 85966254                | 85966339              | <i>EED</i>       | e4            |
| chr11             | 85967419                | 85967564              | <i>EED</i>       | e5            |
| chr11             | 85968547                | 85968648              | <i>EED</i>       | e6            |
| chr11             | 85975204                | 85975315              | <i>EED</i>       | e7            |
| chr11             | 85977115                | 85977268              | <i>EED</i>       | e8            |
| chr11             | 85979488                | 85979613              | <i>EED</i>       | e9            |
| chr11             | 85988012                | 85988190              | <i>EED</i>       | e10           |
| chr11             | 85988950                | 85989043              | <i>EED</i>       | e11           |
| chr11             | 85989431                | 85989577              | <i>EED</i>       | e12           |
| chr11             | 119148866               | 119149017             | <i>CBL</i>       | e8            |
| chr11             | 119149210               | 119149433             | <i>CBL</i>       | e9            |
| chr12             | 11803052                | 11803104              | <i>ETV6</i>      | e1            |
| chr12             | 11905374                | 11905523              | <i>ETV6</i>      | e2            |
| chr12             | 11992064                | 11992248              | <i>ETV6</i>      | e3            |
| chr12             | 12006351                | 12006505              | <i>ETV6</i>      | e4            |
| chr12             | 12022348                | 12022913              | <i>ETV6</i>      | e5            |
| chr12             | 12037369                | 12037531              | <i>ETV6</i>      | e6            |
| chr12             | 12038850                | 12038970              | <i>ETV6</i>      | e7            |
| chr12             | 12043865                | 12043990              | <i>ETV6</i>      | e8            |
| chr12             | 25368365                | 25368504              | <i>KRAS</i>      | e5            |
| chr12             | 25378538                | 25378717              | <i>KRAS</i>      | e4            |
| chr12             | 25380158                | 25380356              | <i>KRAS</i>      | e3            |
| chr12             | 25398198                | 25398328              | <i>KRAS</i>      | e2            |
| chr12             | 50024381                | 50024418              | <i>PRPF40B</i>   | e1            |
| chr12             | 50025174                | 50025337              | <i>PRPF40B</i>   | e2            |
| chr12             | 50025633                | 50025718              | <i>PRPF40B</i>   | e3            |
| chr12             | 50026369                | 50026416              | <i>PRPF40B</i>   | e4            |
| chr12             | 50026628                | 50026673              | <i>PRPF40B</i>   | e5            |
| chr12             | 50026787                | 50026917              | <i>PRPF40B</i>   | e6            |
| chr12             | 50027200                | 50027340              | <i>PRPF40B</i>   | e7            |
| chr12             | 50027410                | 50027454              | <i>PRPF40B</i>   | e8            |
| chr12             | 50027659                | 50027885              | <i>PRPF40B</i>   | e9            |
| chr12             | 50028105                | 50028248              | <i>PRPF40B</i>   | e10           |
| chr12             | 50028311                | 50028395              | <i>PRPF40B</i>   | e11           |
| chr12             | 50028872                | 50029056              | <i>PRPF40B</i>   | e12           |
| chr12             | 50029138                | 50029266              | <i>PRPF40B</i>   | e13           |
| chr12             | 50029616                | 50029786              | <i>PRPF40B</i>   | e14           |
| chr12             | 50030489                | 50030642              | <i>PRPF40B</i>   | e15           |
| chr12             | 50031243                | 50031377              | <i>PRPF40B</i>   | e16           |
| chr12             | 50031506                | 50031617              | <i>PRPF40B</i>   | e17           |
| chr12             | 50035681                | 50035817              | <i>PRPF40B</i>   | e18           |
| chr12             | 50036008                | 50036165              | <i>PRPF40B</i>   | e19           |
| chr12             | 50036353                | 50036468              | <i>PRPF40B</i>   | e20           |

| <b>Chromosome</b> | <b>Coordinate Start</b> | <b>Coordinate End</b> | <b>Gene Name</b> | <b>Exon #</b> |
|-------------------|-------------------------|-----------------------|------------------|---------------|
| chr12             | 50036700                | 50036809              | <i>PRPF40B</i>   | e21           |
| chr12             | 50036996                | 50037190              | <i>PRPF40B</i>   | e22           |
| chr12             | 50037464                | 50037545              | <i>PRPF40B</i>   | e23           |
| chr12             | 50037634                | 50037797              | <i>PRPF40B</i>   | e24           |
| chr12             | 50037873                | 50037985              | <i>PRPF40B</i>   | e25           |
| chr12             | 112856906               | 112856939             | <i>PTPN11</i>    | e1            |
| chr12             | 112884070               | 112884212             | <i>PTPN11</i>    | e2            |
| chr12             | 112888112               | 112888326             | <i>PTPN11</i>    | e3            |
| chr12             | 112890989               | 112891201             | <i>PTPN11</i>    | e4            |
| chr12             | 112892358               | 112892494             | <i>PTPN11</i>    | e5            |
| chr12             | 112893744               | 112893877             | <i>PTPN11</i>    | e6            |
| chr12             | 112910738               | 112910854             | <i>PTPN11</i>    | e7            |
| chr12             | 112915445               | 112915544             | <i>PTPN11</i>    | e8            |
| chr12             | 112915651               | 112915829             | <i>PTPN11</i>    | e9            |
| chr12             | 112919868               | 112920019             | <i>PTPN11</i>    | e10           |
| chr12             | 112924269               | 112924443             | <i>PTPN11</i>    | e11           |
| chr12             | 112926237               | 112926324             | <i>PTPN11</i>    | e12           |
| chr12             | 112926818               | 112926989             | <i>PTPN11</i>    | e13           |
| chr12             | 112939938               | 112940070             | <i>PTPN11</i>    | e14           |
| chr12             | 112942489               | 112942578             | <i>PTPN11</i>    | e15           |
| chr13             | 28592594                | 28592736              | <i>FLT3</i>      | e20           |
| chr13             | 28608014                | 28608138              | <i>FLT3</i>      | e15           |
| chr13             | 28608209                | 28608361              | <i>FLT3</i>      | e14           |
| chr15             | 90631809                | 90631989              | <i>IDH2</i>      | e4            |
| chr17             | 1554086                 | 1554260               | <i>PRPF8</i>     | e43           |
| chr17             | 1554392                 | 1554614               | <i>PRPF8</i>     | e42           |
| chr17             | 1554698                 | 1554857               | <i>PRPF8</i>     | e41           |
| chr17             | 1554932                 | 1555092               | <i>PRPF8</i>     | e40           |
| chr17             | 1556826                 | 1556987               | <i>PRPF8</i>     | e39           |
| chr17             | 1557061                 | 1557320               | <i>PRPF8</i>     | e38           |
| chr17             | 1558634                 | 1558847               | <i>PRPF8</i>     | e37           |
| chr17             | 1559676                 | 1559869               | <i>PRPF8</i>     | e36           |
| chr17             | 1559932                 | 1560065               | <i>PRPF8</i>     | e35           |
| chr17             | 1561537                 | 1561685               | <i>PRPF8</i>     | e34           |
| chr17             | 1561810                 | 1562067               | <i>PRPF8</i>     | e33           |
| chr17             | 1562641                 | 1562852               | <i>PRPF8</i>     | e32           |
| chr17             | 1563125                 | 1563305               | <i>PRPF8</i>     | e31           |
| chr17             | 1563716                 | 1563882               | <i>PRPF8</i>     | e30           |
| chr17             | 1563982                 | 1564131               | <i>PRPF8</i>     | e29           |
| chr17             | 1564277                 | 1564466               | <i>PRPF8</i>     | e28           |
| chr17             | 1564555                 | 1564710               | <i>PRPF8</i>     | e27           |
| chr17             | 1564895                 | 1565094               | <i>PRPF8</i>     | e26           |
| chr17             | 1565190                 | 1565457               | <i>PRPF8</i>     | e25           |
| chr17             | 1576365                 | 1576501               | <i>PRPF8</i>     | e24           |
| chr17             | 1576641                 | 1576871               | <i>PRPF8</i>     | e23           |
| chr17             | 1577030                 | 1577196               | <i>PRPF8</i>     | e22           |
| chr17             | 1577726                 | 1577984               | <i>PRPF8</i>     | e21           |
| chr17             | 1578436                 | 1578643               | <i>PRPF8</i>     | e20           |
| chr17             | 1578904                 | 1579116               | <i>PRPF8</i>     | e19           |
| chr17             | 1579212                 | 1579358               | <i>PRPF8</i>     | e18           |
| chr17             | 1579491                 | 1579674               | <i>PRPF8</i>     | e17           |
| chr17             | 1579789                 | 1580015               | <i>PRPF8</i>     | e16           |
| chr17             | 1580260                 | 1580476               | <i>PRPF8</i>     | e15           |
| chr17             | 1580849                 | 1580998               | <i>PRPF8</i>     | e14           |
| chr17             | 1581802                 | 1581956               | <i>PRPF8</i>     | e13           |

| <b>Chromosome</b> | <b>Coordinate Start</b> | <b>Coordinate End</b> | <b>Gene Name</b> | <b>Exon #</b> |
|-------------------|-------------------------|-----------------------|------------------|---------------|
| chr17             | 1582046                 | 1582185               | <i>PRPF8</i>     | e12           |
| chr17             | 1582301                 | 1582510               | <i>PRPF8</i>     | e11           |
| chr17             | 1582575                 | 1582714               | <i>PRPF8</i>     | e10           |
| chr17             | 1582893                 | 1583103               | <i>PRPF8</i>     | e9            |
| chr17             | 1584010                 | 1584135               | <i>PRPF8</i>     | e8            |
| chr17             | 1584213                 | 1584358               | <i>PRPF8</i>     | e7            |
| chr17             | 1584762                 | 1584994               | <i>PRPF8</i>     | e6            |
| chr17             | 1585104                 | 1585342               | <i>PRPF8</i>     | e5            |
| chr17             | 1585413                 | 1585597               | <i>PRPF8</i>     | e4            |
| chr17             | 1586817                 | 1587005               | <i>PRPF8</i>     | e3            |
| chr17             | 1587756                 | 1587875               | <i>PRPF8</i>     | e2            |
| chr17             | 7572917                 | 7573018               | <i>TP53</i>      | e11           |
| chr17             | 7573917                 | 7574043               | <i>TP53</i>      | e10           |
| chr17             | 7576843                 | 7576936               | <i>TP53</i>      | e9            |
| chr17             | 7577009                 | 7577165               | <i>TP53</i>      | e8            |
| chr17             | 7577489                 | 7577618               | <i>TP53</i>      | e7            |
| chr17             | 7578167                 | 7578299               | <i>TP53</i>      | e6            |
| chr17             | 7578361                 | 7578564               | <i>TP53</i>      | e5            |
| chr17             | 7579302                 | 7579600               | <i>TP53</i>      | e4            |
| chr17             | 7579690                 | 7579731               | <i>TP53</i>      | e3            |
| chr17             | 7579829                 | 7579922               | <i>TP53</i>      | e2            |
| chr17             | 7748863                 | 7749019               | <i>KDM6B</i>     | e4            |
| chr17             | 7749180                 | 7749298               | <i>KDM6B</i>     | e5            |
| chr17             | 7749386                 | 7749625               | <i>KDM6B</i>     | e6            |
| chr17             | 7749708                 | 7749820               | <i>KDM6B</i>     | e7            |
| chr17             | 7749887                 | 7750068               | <i>KDM6B</i>     | e8            |
| chr17             | 7750127                 | 7750344               | <i>KDM6B</i>     | e9            |
| chr17             | 7750413                 | 7750780               | <i>KDM6B</i>     | e10           |
| chr17             | 7750854                 | 7753056               | <i>KDM6B</i>     | e11           |
| chr17             | 7753129                 | 7753275               | <i>KDM6B</i>     | e12           |
| chr17             | 7753380                 | 7753505               | <i>KDM6B</i>     | e13           |
| chr17             | 7754329                 | 7754554               | <i>KDM6B</i>     | e14           |
| chr17             | 7754638                 | 7754722               | <i>KDM6B</i>     | e15           |
| chr17             | 7754786                 | 7754877               | <i>KDM6B</i>     | e16           |
| chr17             | 7754956                 | 7755124               | <i>KDM6B</i>     | e17           |
| chr17             | 7755259                 | 7755393               | <i>KDM6B</i>     | e18           |
| chr17             | 7755457                 | 7755664               | <i>KDM6B</i>     | e19           |
| chr17             | 7755803                 | 7755964               | <i>KDM6B</i>     | e20           |
| chr17             | 7756308                 | 7756454               | <i>KDM6B</i>     | e21           |
| chr17             | 7756518                 | 7756849               | <i>KDM6B</i>     | e22           |
| chr17             | 29422318                | 29422397              | <i>NF1</i>       | e1            |
| chr17             | 29482991                | 29483154              | <i>NF1</i>       | e2            |
| chr17             | 29486018                | 29486121              | <i>NF1</i>       | e3            |
| chr17             | 29490194                | 29490404              | <i>NF1</i>       | e4            |
| chr17             | 29496899                | 29497025              | <i>NF1</i>       | e5            |
| chr17             | 29508430                | 29508517              | <i>NF1</i>       | e6            |
| chr17             | 29508718                | 29508813              | <i>NF1</i>       | e7            |
| chr17             | 29509516                | 29509693              | <i>NF1</i>       | e8            |
| chr17             | 29527430                | 29527623              | <i>NF1</i>       | e9            |
| chr17             | 29528045                | 29528187              | <i>NF1</i>       | e10           |
| chr17             | 29528419                | 29528513              | <i>NF1</i>       | e11           |
| chr17             | 29533248                | 29533399              | <i>NF1</i>       | e12           |
| chr17             | 29541459                | 29541613              | <i>NF1</i>       | e13           |
| chr17             | 29546013                | 29546146              | <i>NF1</i>       | e14           |
| chr17             | 29548858                | 29548957              | <i>NF1</i>       | e15           |

| <b>Chromosome</b> | <b>Coordinate Start</b> | <b>Coordinate End</b> | <b>Gene Name</b> | <b>Exon #</b> |
|-------------------|-------------------------|-----------------------|------------------|---------------|
| chr17             | 29550452                | 29550595              | <i>NF1</i>       | e16           |
| chr17             | 29552103                | 29552278              | <i>NF1</i>       | e17           |
| chr17             | 29553443                | 29553712              | <i>NF1</i>       | e18           |
| chr17             | 29554226                | 29554319              | <i>NF1</i>       | e19           |
| chr17             | 29554531                | 29554634              | <i>NF1</i>       | e20           |
| chr17             | 29556033                | 29556493              | <i>NF1</i>       | e21           |
| chr17             | 29556843                | 29557002              | <i>NF1</i>       | e22           |
| chr17             | 29557268                | 29557410              | <i>NF1</i>       | e23           |
| chr17             | 29557850                | 29557953              | <i>NF1</i>       | e24           |
| chr17             | 29559081                | 29559217              | <i>NF1</i>       | e25           |
| chr17             | 29559708                | 29559909              | <i>NF1</i>       | e26           |
| chr17             | 29560010                | 29560241              | <i>NF1</i>       | e27           |
| chr17             | 29562619                | 29562800              | <i>NF1</i>       | e28           |
| chr17             | 29562926                | 29563049              | <i>NF1</i>       | e29           |
| chr17             | 29575992                | 29576147              | <i>NF1</i>       | e30           |
| chr17             | 29579946                | 29580028              | <i>NF1</i>       | e31           |
| chr17             | 29585352                | 29585530              | <i>NF1</i>       | e32           |
| chr17             | 29586040                | 29586157              | <i>NF1</i>       | e33           |
| chr17             | 29587377                | 29587543              | <i>NF1</i>       | e34           |
| chr17             | 29588719                | 29588885              | <i>NF1</i>       | e35           |
| chr17             | 29592237                | 29592367              | <i>NF1</i>       | e36           |
| chr17             | 29652828                | 29653280              | <i>NF1</i>       | e37           |
| chr17             | 29654507                | 29654867              | <i>NF1</i>       | e38           |
| chr17             | 29657304                | 29657526              | <i>NF1</i>       | e39           |
| chr17             | 29661846                | 29662059              | <i>NF1</i>       | e40           |
| chr17             | 29663341                | 29663501              | <i>NF1</i>       | e41           |
| chr17             | 29663643                | 29663942              | <i>NF1</i>       | e42           |
| chr17             | 29664376                | 29664610              | <i>NF1</i>       | e43           |
| chr17             | 29664827                | 29664908              | <i>NF1</i>       | e44           |
| chr17             | 29665033                | 29665167              | <i>NF1</i>       | e45           |
| chr17             | 29665712                | 29665833              | <i>NF1</i>       | e46           |
| chr17             | 29667513                | 29667673              | <i>NF1</i>       | e47           |
| chr17             | 29670017                | 29670163              | <i>NF1</i>       | e48           |
| chr17             | 29676128                | 29676279              | <i>NF1</i>       | e49           |
| chr17             | 29677191                | 29677346              | <i>NF1</i>       | e50           |
| chr17             | 29679265                | 29679442              | <i>NF1</i>       | e51           |
| chr17             | 29683468                | 29683610              | <i>NF1</i>       | e52           |
| chr17             | 29683968                | 29684118              | <i>NF1</i>       | e53           |
| chr17             | 29684277                | 29684397              | <i>NF1</i>       | e54           |
| chr17             | 29685488                | 29685650              | <i>NF1</i>       | e55           |
| chr17             | 29685977                | 29686043              | <i>NF1</i>       | e56           |
| chr17             | 29687495                | 29687731              | <i>NF1</i>       | e57           |
| chr17             | 29701021                | 29701183              | <i>NF1</i>       | e58           |
| chr17             | 30264256                | 30264549              | <i>SUZ12</i>     | e1            |
| chr17             | 30267295                | 30267361              | <i>SUZ12</i>     | e2            |
| chr17             | 30267431                | 30267515              | <i>SUZ12</i>     | e3            |
| chr17             | 30274626                | 30274714              | <i>SUZ12</i>     | e4            |
| chr17             | 30293156                | 30293225              | <i>SUZ12</i>     | e5            |
| chr17             | 30300155                | 30300260              | <i>SUZ12</i>     | e6            |
| chr17             | 30302491                | 30302742              | <i>SUZ12</i>     | e7            |
| chr17             | 30303530                | 30303643              | <i>SUZ12</i>     | e8            |
| chr17             | 30310008                | 30310133              | <i>SUZ12</i>     | e9            |
| chr17             | 30315329                | 30315526              | <i>SUZ12</i>     | e10           |
| chr17             | 30320251                | 30320362              | <i>SUZ12</i>     | e11           |
| chr17             | 30320874                | 30321037              | <i>SUZ12</i>     | e12           |

| <b>Chromosome</b> | <b>Coordinate Start</b> | <b>Coordinate End</b> | <b>Gene Name</b> | <b>Exon #</b> |
|-------------------|-------------------------|-----------------------|------------------|---------------|
| chr17             | 30321573                | 30321750              | <i>SUZ12</i>     | e13           |
| chr17             | 30322573                | 30322791              | <i>SUZ12</i>     | e14           |
| chr17             | 30323807                | 30323906              | <i>SUZ12</i>     | e15           |
| chr17             | 30325667                | 30326032              | <i>SUZ12</i>     | e16           |
| chr17             | 74732233                | 74732556              | <i>SRSF2</i>     | e2            |
| chr17             | 74732871                | 74733252              | <i>SRSF2</i>     | e1            |
| chr19             | 33792234                | 33793330              | <i>CEBPA</i>     | e1            |
| chr19             | 56166461                | 56166529              | <i>U2AF2</i>     | e1            |
| chr19             | 56170566                | 56170721              | <i>U2AF2</i>     | e2            |
| chr19             | 56171533                | 56171597              | <i>U2AF2</i>     | e3            |
| chr19             | 56171872                | 56171995              | <i>U2AF2</i>     | e4            |
| chr19             | 56172394                | 56172565              | <i>U2AF2</i>     | e5            |
| chr19             | 56173858                | 56173994              | <i>U2AF2</i>     | e6            |
| chr19             | 56174962                | 56175120              | <i>U2AF2</i>     | e7            |
| chr19             | 56179863                | 56179962              | <i>U2AF2</i>     | e8            |
| chr19             | 56180026                | 56180168              | <i>U2AF2</i>     | e9            |
| chr19             | 56180439                | 56180557              | <i>U2AF2</i>     | e10           |
| chr19             | 56180800                | 56181068              | <i>U2AF2</i>     | e11           |
| chr19             | 56185290                | 56185444              | <i>U2AF2</i>     | e12           |
| chr20             | 30946569                | 30946645              | <i>ASXL1</i>     | e1            |
| chr20             | 30954177                | 30954279              | <i>ASXL1</i>     | e2            |
| chr20             | 30956808                | 30956936              | <i>ASXL1</i>     | e4            |
| chr20             | 31015921                | 31016061              | <i>ASXL1</i>     | e5            |
| chr20             | 31016118                | 31016235              | <i>ASXL1</i>     | e6            |
| chr20             | 31017131                | 31017244              | <i>ASXL1</i>     | e7            |
| chr20             | 31017694                | 31017866              | <i>ASXL1</i>     | e8            |
| chr20             | 31019114                | 31019297              | <i>ASXL1</i>     | e9            |
| chr20             | 31019376                | 31019492              | <i>ASXL1</i>     | e10           |
| chr20             | 31020673                | 31020798              | <i>ASXL1</i>     | e11           |
| chr20             | 31021077                | 31021730              | <i>ASXL1</i>     | e12           |
| chr20             | 31022225                | 31025151              | <i>ASXL1</i>     | e13           |
| chr20             | 42295914                | 42295953              | <i>MYBL2</i>     | e1            |
| chr20             | 42302436                | 42302549              | <i>MYBL2</i>     | e2            |
| chr20             | 42310414                | 42310505              | <i>MYBL2</i>     | e3            |
| chr20             | 42311424                | 42311536              | <i>MYBL2</i>     | e4            |
| chr20             | 42315482                | 42315722              | <i>MYBL2</i>     | e5            |
| chr20             | 42320787                | 42320969              | <i>MYBL2</i>     | e6            |
| chr20             | 42328387                | 42328694              | <i>MYBL2</i>     | e7            |
| chr20             | 42331120                | 42331553              | <i>MYBL2</i>     | e8            |
| chr20             | 42333849                | 42334008              | <i>MYBL2</i>     | e9            |
| chr20             | 42338593                | 42338712              | <i>MYBL2</i>     | e10           |
| chr20             | 42340118                | 42340251              | <i>MYBL2</i>     | e11           |
| chr20             | 42341632                | 42341756              | <i>MYBL2</i>     | e12           |
| chr20             | 42343764                | 42343933              | <i>MYBL2</i>     | e13           |
| chr20             | 42344589                | 42344737              | <i>MYBL2</i>     | e14           |
| chr20             | 57484395                | 57484488              | <i>GNAS</i>      | e8            |
| chr20             | 57484566                | 57484644              | <i>GNAS</i>      | e9            |
| chr21             | 36164422                | 36164917              | <i>RUNX1</i>     | e8            |
| chr21             | 36171588                | 36171769              | <i>RUNX1</i>     | e7            |
| chr21             | 36206697                | 36206908              | <i>RUNX1</i>     | e6            |
| chr21             | 36231761                | 36231885              | <i>RUNX1</i>     | e5            |
| chr21             | 36252844                | 36253020              | <i>RUNX1</i>     | e4            |
| chr21             | 36259130                | 36259403              | <i>RUNX1</i>     | e3            |
| chr21             | 36265212                | 36265270              | <i>RUNX1</i>     | e2            |
| chr21             | 36421129                | 36421206              | <i>RUNX1</i>     | e1            |



| <b>Chromosome</b> | <b>Coordinate Start</b> | <b>Coordinate End</b> | <b>Gene Name</b> | <b>Exon #</b> |
|-------------------|-------------------------|-----------------------|------------------|---------------|
| chr21             | 44513202                | 44513369              | <i>U2AF1</i>     | e8            |
| chr21             | 44514571                | 44514683              | <i>U2AF1</i>     | e7            |
| chr21             | 44514755                | 44514908              | <i>U2AF1</i>     | e6            |
| chr21             | 44515538                | 44515656              | <i>U2AF1</i>     | e5            |
| chr21             | 44515794                | 44515863              | <i>U2AF1</i>     | e4            |
| chr21             | 44521466                | 44521552              | <i>U2AF1</i>     | e3            |
| chr21             | 44524415                | 44524522              | <i>U2AF1</i>     | e2            |
| chr21             | 44527551                | 44527614              | <i>U2AF1</i>     | e1            |
| chr22             | 30730573                | 30730694              | <i>SF3A1</i>     | e16           |
| chr22             | 30731446                | 30731537              | <i>SF3A1</i>     | e15           |
| chr22             | 30731631                | 30731752              | <i>SF3A1</i>     | e14           |
| chr22             | 30733005                | 30733179              | <i>SF3A1</i>     | e13           |
| chr22             | 30733669                | 30733896              | <i>SF3A1</i>     | e12           |
| chr22             | 30734768                | 30735033              | <i>SF3A1</i>     | e11           |
| chr22             | 30735109                | 30735250              | <i>SF3A1</i>     | e10           |
| chr22             | 30736175                | 30736380              | <i>SF3A1</i>     | e9            |
| chr22             | 30736674                | 30736811              | <i>SF3A1</i>     | e8            |
| chr22             | 30737671                | 30737884              | <i>SF3A1</i>     | e7            |
| chr22             | 30738179                | 30738349              | <i>SF3A1</i>     | e6            |
| chr22             | 30738784                | 30738878              | <i>SF3A1</i>     | e5            |
| chr22             | 30740912                | 30741189              | <i>SF3A1</i>     | e4            |
| chr22             | 30742291                | 30742518              | <i>SF3A1</i>     | e3            |
| chr22             | 30748930                | 30749071              | <i>SF3A1</i>     | e2            |
| chr22             | 30752709                | 30752791              | <i>SF3A1</i>     | e1            |
| chrX              | 15808609                | 15808669              | <i>ZRSR2</i>     | e1            |
| chrX              | 15809047                | 15809146              | <i>ZRSR2</i>     | e2            |
| chrX              | 15817985                | 15818086              | <i>ZRSR2</i>     | e3            |
| chrX              | 15821801                | 15821929              | <i>ZRSR2</i>     | e4            |
| chrX              | 15822224                | 15822330              | <i>ZRSR2</i>     | e5            |
| chrX              | 15826346                | 15826404              | <i>ZRSR2</i>     | e6            |
| chrX              | 15827313                | 15827451              | <i>ZRSR2</i>     | e7            |
| chrX              | 15833790                | 15834023              | <i>ZRSR2</i>     | e8            |
| chrX              | 15836700                | 15836775              | <i>ZRSR2</i>     | e9            |
| chrX              | 15838320                | 15838449              | <i>ZRSR2</i>     | e10           |
| chrX              | 15840844                | 15841375              | <i>ZRSR2</i>     | e11           |
| chrX              | 76763819                | 76764117              | <i>ATRX</i>      | e35           |
| chrX              | 76776256                | 76776404              | <i>ATRX</i>      | e34           |
| chrX              | 76776871                | 76776986              | <i>ATRX</i>      | e33           |
| chrX              | 76777731                | 76777876              | <i>ATRX</i>      | e32           |
| chrX              | 76778720                | 76778889              | <i>ATRX</i>      | e31           |
| chrX              | 76812912                | 76813126              | <i>ATRX</i>      | e30           |
| chrX              | 76814130                | 76814327              | <i>ATRX</i>      | e29           |
| chrX              | 76829705                | 76829833              | <i>ATRX</i>      | e28           |
| chrX              | 76845294                | 76845420              | <i>ATRX</i>      | e27           |
| chrX              | 76849156                | 76849329              | <i>ATRX</i>      | e26           |
| chrX              | 76854870                | 76855059              | <i>ATRX</i>      | e25           |
| chrX              | 76855191                | 76855299              | <i>ATRX</i>      | e24           |
| chrX              | 76855893                | 76856043              | <i>ATRX</i>      | e23           |
| chrX              | 76872071                | 76872208              | <i>ATRX</i>      | e22           |
| chrX              | 76874264                | 76874459              | <i>ATRX</i>      | e21           |
| chrX              | 76875853                | 76876010              | <i>ATRX</i>      | e20           |
| chrX              | 76888685                | 76888882              | <i>ATRX</i>      | e19           |
| chrX              | 76889044                | 76889210              | <i>ATRX</i>      | e18           |
| chrX              | 76890075                | 76890204              | <i>ATRX</i>      | e17           |
| chrX              | 76891396                | 76891557              | <i>ATRX</i>      | e16           |

| Chromosome | Coordinate Start | Coordinate End | Gene Name | Exon # |
|------------|------------------|----------------|-----------|--------|
| chrX       | 76907594         | 76907853       | ATRX      | e15    |
| chrX       | 76909578         | 76909700       | ATRX      | e14    |
| chrX       | 76912040         | 76912153       | ATRX      | e13    |
| chrX       | 76918861         | 76919057       | ATRX      | e12    |
| chrX       | 76920124         | 76920277       | ATRX      | e11    |
| chrX       | 76931711         | 76931803       | ATRX      | e10    |
| chrX       | 76937002         | 76940095       | ATRX      | e9     |
| chrX       | 76940421         | 76940508       | ATRX      | e8     |
| chrX       | 76944301         | 76944430       | ATRX      | e7     |
| chrX       | 76949303         | 76949436       | ATRX      | e6     |
| chrX       | 76952055         | 76952202       | ATRX      | e5     |
| chrX       | 76953061         | 76953133       | ATRX      | e4     |
| chrX       | 76954052         | 76954127       | ATRX      | e3     |
| chrX       | 76972598         | 76972730       | ATRX      | e2     |
| chrX       | 77041458         | 77041497       | ATRX      | e1     |
| chrX       | 133511638        | 133511795      | PHF6      | e2     |
| chrX       | 133512025        | 133512146      | PHF6      | e3     |
| chrX       | 133527521        | 133527674      | PHF6      | e4     |
| chrX       | 133527929        | 133527992      | PHF6      | e5     |
| chrX       | 133547511        | 133547697      | PHF6      | e6     |
| chrX       | 133547843        | 133548006      | PHF6      | e7     |
| chrX       | 133549036        | 133549160      | PHF6      | e8     |
| chrX       | 133551189        | 133551342      | PHF6      | e9     |
| chrX       | 133559221        | 133559370      | PHF6      | e10    |

#### Fingerprint Variant Coordinates

| Chromosome | Coordinate Start | Coordinate End | SNP ID     |
|------------|------------------|----------------|------------|
| chr1       | 14096751         | 14096891       | rs1210110  |
| chr1       | 14804804         | 14804944       | rs7555566  |
| chr2       | 8178665          | 8178805        | rs1364054  |
| chr2       | 67241104         | 67241244       | rs6734275  |
| chr2       | 223845872        | 223846012      | rs7584993  |
| chr3       | 17077198         | 17077338       | rs17272796 |
| chr3       | 37627042         | 37627182       | rs1155741  |
| chr3       | 151899634        | 151899774      | rs161792   |
| chr4       | 27162408         | 27162548       | rs11940551 |
| chr5       | 88416284         | 88416424       | rs9293511  |
| chr6       | 79424363         | 79424503       | rs9352613  |
| chr6       | 153344461        | 153344601      | rs685449   |
| chr7       | 86983645         | 86983785       | rs7808249  |
| chr8       | 71012741         | 71012881       | rs1106334  |
| chr10      | 129200894        | 129201034      | rs11017876 |
| chr13      | 35252812         | 35252952       | rs9572094  |
| chr14      | 96103029         | 96103169       | rs4905366  |
| chr15      | 47873479         | 47873619       | rs4775699  |
| chr16      | 51098357         | 51098497       | rs1528601  |
| chr17      | 20851665         | 20851805       | rs11655512 |
| chr17      | 43131410         | 43131550       | rs4793172  |
| chr22      | 33229760         | 33229900       | rs242076   |
| chrX       | 320510           | 320650         | rs6603251  |

**Supplemental Table 3:** Frequency of mutations in targeted genes with one or more mutations.

| Gene             | N Mutations (%) | No. achieving CR N (%) |
|------------------|-----------------|------------------------|
| Any gene mutated | 80(92)          | 52 (65)                |
| No gene mutated  | 7(8)            | 7 (100)                |
| <i>ASXL1</i>     | 25 (29)         | 18 (72)                |
| <i>TP53</i>      | 18 (21)         | 7 (39)                 |
| <i>DNMT3A</i>    | 16 (18)         | 10 (63)                |
| <i>RUNX1</i>     | 14 (16)         | 11 (79)                |
| <i>U2AF1</i>     | 12 (14)         | 11 (92)                |
| <i>TET2</i>      | 11 (13)         | 6 (55)                 |
| <i>SRSF2</i>     | 9 (10)          | 7 (78)                 |
| <i>SF3B1</i>     | 8 (9)           | 6 (75)                 |
| <i>PRPF8</i>     | 8 (9)           | 6 (75)                 |
| <i>NRAS</i>      | 7 (8)           | 5 (71)                 |
| <i>SUZ12</i>     | 6 (7)           | 3 (50)                 |
| <i>CBL</i>       | 6 (7)           | 3 (50)                 |
| <i>KDM6B</i>     | 6 (7)           | 4 (67)                 |
| <i>PRPF40B</i>   | 5 (6)           | 3 (60)                 |
| <i>WT1</i>       | 5 (6)           | 5 (100)                |
| <i>JAK2</i>      | 5 (6)           | 4 (80)                 |
| <i>ZRSR2</i>     | 5 (6)           | 4 (80)                 |
| <i>GATA2</i>     | 4 (5)           | 1 (25)                 |
| <i>PHF6</i>      | 4 (5)           | 4 (100)                |
| <i>NF1</i>       | 4 (5)           | 3 (75)                 |
| <i>KRAS</i>      | 3 (3)           | 3 (100)                |
| <i>EZH2</i>      | 3 (3)           | 2 (67)                 |
| <i>ETV6</i>      | 3 (3)           | 2 (67)                 |
| <i>IDH1</i>      | 3 (3)           | 2 (67)                 |
| <i>IDH2</i>      | 2 (2)           | 2 (100)                |
| <i>NCSTN</i>     | 2 (2)           | 1 (50)                 |
| <i>MAML1</i>     | 2 (2)           | 2 (100)                |
| <i>EED</i>       | 2 (2)           | 2 (100)                |
| <i>ATRX</i>      | 2 (2)           | 1 (50)                 |
| <i>LUC7L2</i>    | 2 (2)           | 2 (100)                |
| <i>PTPN11</i>    | 2 (2)           | 1 (50)                 |
| <i>SF3A1</i>     | 1 (1)           | 1 (100)                |
| <i>BRAF</i>      | 1 (1)           | 0 (0)                  |
| <i>CEPBA</i>     | 1 (1)           | 1 (100)                |
| <i>U2AF2</i>     | 1 (1)           | 0 (0)                  |
| <i>FLT3</i>      | 1 (1)           | 1 (100)                |
| <i>MYBL2</i>     | 1 (1)           | 1 (100)                |
| <i>CBLB</i>      | 1 (1)           | 0 (0)                  |

**Supplemental Table 4:** The hazard ratio for disease progression associated with clinical features and mutations in univariate and adjusted analyses.

| Variable                           | Univariate<br>HR (95% CI) | p-value          | Adjusted <sup>†</sup><br>HR (95% CI) | p-value      |
|------------------------------------|---------------------------|------------------|--------------------------------------|--------------|
| Blast %                            |                           |                  |                                      |              |
| ≥5% vs. <5%                        | <b>2.14 (1.24, 3.68)</b>  | <b>0.006</b>     |                                      |              |
| Conditioning Regimen               |                           |                  |                                      |              |
| Non-Myeloablative vs. Ablative     | <b>2.35 (1.24, 4.46)</b>  | <b>0.009</b>     |                                      |              |
| Karyotype                          |                           |                  |                                      |              |
| Complex vs. Other                  | <b>2.23 (1.30, 3.81)</b>  | <b>0.004</b>     |                                      |              |
| Donor Type                         |                           |                  |                                      |              |
| Unrelated vs. Related              | 1.62 (0.90, 2.92)         | 0.11             |                                      |              |
| Gene Mutation (Present vs. Absent) |                           |                  |                                      |              |
| <i>TP53</i>                        | <b>3.97 (2.22, 7.10)</b>  | <b>&lt;0.001</b> | <b>2.48 (1.25, 4.94)</b>             | <b>0.01</b>  |
| <i>DNMT3A</i>                      | 1.76 (0.98, 3.19)         | 0.061            | <b>2.56 (1.27, 5.16)</b>             | <b>0.009</b> |
| <i>NOTCH2</i>                      | 1.67 (0.60, 4.65)         | 0.33             | 1.66 (0.55, 4.97)                    | 0.37         |
| <i>TET2</i>                        | 1.30 (0.61, 2.75)         | 0.49             | 1.82 (0.82, 4.03)                    | 0.14         |
| <i>PRPF8</i>                       | 1.27 (0.54, 2.97)         | 0.58             | 1.11 (0.46, 2.65)                    | 0.82         |
| <i>ZRSR2</i>                       | 1.11 (0.40, 3.06)         | 0.85             | 1.13 (0.39, 3.23)                    | 0.83         |
| <i>SF3B1</i>                       | 0.94 (0.37, 2.35)         | 0.89             | 2.30 (0.83, 6.42)                    | 0.11         |
| <i>CBL</i>                         | 0.92 (0.33, 2.54)         | 0.87             | 0.74 (0.26, 2.12)                    | 0.57         |
| <i>AXSL1</i>                       | 0.83 (0.47, 1.48)         | 0.53             | 0.74 (0.40, 1.37)                    | 0.34         |
| <i>NRAS</i>                        | 0.81 (0.32, 2.02)         | 0.65             | 0.65 (0.25, 1.67)                    | 0.37         |
| <i>U2AF1</i>                       | 0.76 (0.34, 1.67)         | 0.49             | 1.07 (0.45, 2.52)                    | 0.88         |
| <i>SRSF2</i>                       | 0.76 (0.30, 1.90)         | 0.55             | 0.84 (0.33, 2.14)                    | 0.71         |
| <i>SUZ12</i>                       | 0.70 (0.22, 2.24)         | 0.54             | 1.08 (0.30, 3.94)                    | 0.9          |
| <i>RUNX1</i>                       | 0.69 (0.31, 1.51)         | 0.35             | 0.71 (0.31, 1.63)                    | 0.42         |
| <i>PRPF40B</i>                     | 0.47 (0.11, 1.92)         | 0.29             | 0.43 (0.10, 1.86)                    | 0.26         |
| <i>WT1</i>                         | 0.40 (0.10, 1.64)         | 0.20             | 0.45 (0.11, 1.88)                    | 0.27         |
| <i>JAK2</i>                        | 0.19 (0.03, 1.36)         | 0.10             | 0.24 (0.03, 1.78)                    | 0.16         |

<sup>†</sup> Adjusted for blast %, conditioning regimen, complex karyotype, and donor type

**Supplemental Table 5: Characteristics of Patients with and without TP53 Mutations**

|                                                 | N (%)              | TP53 no Mutation   | TP53 Mutation     | p-value |
|-------------------------------------------------|--------------------|--------------------|-------------------|---------|
| No. of Patients                                 | 87                 | 69                 | 19                |         |
| Age, median (range)                             | 58 (19, 73)        | 58 (18, 73)        | 58 (41, 70)       | 0.57    |
| Age, ≥60 yrs.                                   | 34 (39)            | 26 (38)            | 8 (44)            | 0.60    |
| Sex, Male                                       | 60 (69)            | 45 (65)            | 15 (83)           | 0.16    |
| FAB at Transplant†                              |                    |                    |                   |         |
| RA                                              | 24 (28)            | 20 (29)            | 4 (22)            | 0.41    |
| RARS                                            | 7 (8)              | 7 (10)             | 0 (0)             |         |
| RAEB                                            | 42 (48)            | 32 (46)            | 10 (56)           |         |
| RAEB-t                                          | 1 (1)              | 0 (0)              | 1 (6)             |         |
| CMML                                            | 5 (6)              | 4 (6)              | 1 (6)             |         |
| MDS-U                                           | 1 (1)              | 1 (1)              | 0 (0)             |         |
| Other/Unknown                                   | 7 (8)              | 5 (7)              | 2 (11)            |         |
| Karyotype                                       |                    |                    |                   |         |
| -7/7q- or +1 (+/- other)                        | 15 (17)            | 14 (20)            | 1 (6)             | <0.001  |
| Normal                                          | 28 (32)            | 28 (41)            | 0 (0)             |         |
| Complex                                         | 28 (32)            | 12 (17)            | 16 (89)           |         |
| Other (any not listed above)                    | 8 (9)              | 8 (12)             | 0 (0)             |         |
| Unknown                                         | 8 (9)              | 7 (10)             | 1 (6)             |         |
| Blast %, median (range)                         | 5 (0, 23)          | 4 (0, 17)          | 10 (1, 23)        | 0.064   |
| < 5%                                            | 42 (48)            | 37 (54)            | 5 (28)            | 0.14    |
| 5 - 10%                                         | 32 (37)            | 22 (32)            | 10 (56)           |         |
| 11 - 30%                                        | 13 (15)            | 10 (14)            | 3 (17)            |         |
| Hemoglobin, median (range)                      | 9.9 (7.1, 16.2)    | 9.9 (7.1, 16.2)    | 9.7 (7.1, 15.6)   | 0.75    |
| < 8.0 (gm/dl)                                   | 12 (14)            | 9 (13)             | 3 (17)            | 0.83    |
| 8.0 – 9.99 (gm/dl)                              | 32 (37)            | 26 (38)            | 6 (33)            |         |
| 10.0 – 11.99 (gm/dl)                            | 24 (28)            | 20 (29)            | 4 (22)            |         |
| ≥12.0 (gm/dl)                                   | 19 (22)            | 14 (20)            | 5 (28)            |         |
| Absolute Neutrophil Count (ANC), median (range) | 1,233 (14, 57,288) | 1,320 (14, 57,288) | 1,020 (68, 9,583) | 0.11    |
| < 500 (cells/mm <sup>3</sup> )                  | 22 (25)            | 15 (22)            | 7 (39)            | 0.57    |
| 500 – 1,499 (cells/mm <sup>3</sup> )            | 28 (32)            | 22 (32)            | 6 (33)            |         |
| 1,500 - 9,999 (cells/mm <sup>3</sup> )          | 32 (37)            | 27 (39)            | 5 (28)            |         |
| ≥10,000 (cells/mm <sup>3</sup> )                | 4 (5)              | 4 (6)              | 0 (0)             |         |
| Unknown                                         | 1 (1)              | 1 (1)              | 0 (0)             |         |
| Platelets, median (range)                       | 64 (4, 290)        | 66 (4, 290)        | 53 (12, 127)      | 0.038   |
| < 50 K                                          | 28 (32)            | 20 (29)            | 8 (44)            | 0.21    |
| 50 – 149 K                                      | 50 (57)            | 40 (58)            | 10 (56)           |         |
| ≥ 150 K                                         | 9 (10)             | 9 (13)             | 0 (0)             |         |
| Patient-Donor Sex Matching                      |                    |                    |                   |         |
| M-M                                             | 34 (39)            | 23 (33)            | 11 (61)           | 0.12    |
| M-F                                             | 26 (30)            | 22 (32)            | 4 (22)            |         |
| F-M                                             | 9 (10)             | 7 (10)             | 2 (11)            |         |
| F-F                                             | 18 (21)            | 17 (25)            | 1 (6)             |         |
| Type of Conditioning Regimen                    |                    |                    |                   |         |
| Myeloablative                                   | 25 (29)            | 23 (33)            | 2 (11)            | 0.082   |

|                                        | N (%)   | TP53 no Mutation | TP53 Mutation | p-value |
|----------------------------------------|---------|------------------|---------------|---------|
| Non-myeloablative Conditioning Regimen | 62 (71) | 46 (67)          | 16 (89)       |         |
| Bu/Flu +/-Other                        | 53 (61) | 39 (57)          | 14 (77)       | 0.14    |
| Cy/TBI                                 | 30 (34) | 27 (39)          | 3 (17)        |         |
| Other                                  | 4 (5)   | 3 (4)            | 1 (6)         |         |
| Donor Cell Source                      |         |                  |               |         |
| PBSC                                   | 80 (92) | 62 (90)          | 18 (100)      | 0.34    |
| BM                                     | 7 (8)   | 7 (10)           | 0 (0)         |         |
| HLA Matching (6/6) and Donor Relation  |         |                  |               |         |
| MUD                                    | 53 (61) | 39 (57)          | 14 (78)       | 0.011   |
| MMURD                                  | 7 (8)   | 4 (6)            | 3 (17)        |         |
| MRD                                    | 27 (31) | 26 (38)          | 1 (6)         |         |

**Supplemental Table 6:** Characteristics of TP53 mutation identified in this cohort.

| <b>Protein Effect of Variant</b> | <b>Variant Allele Fraction</b> | <b>Reported as Somatic in COSMIC</b> | <b>Sift Predicted Impact</b> |
|----------------------------------|--------------------------------|--------------------------------------|------------------------------|
| p.C176Y                          | 48%                            | Yes                                  | Damaging                     |
| p.A161T                          | 34%                            | Yes                                  | Damaging                     |
| p.S241Y                          | 3%                             | Yes                                  | Damaging                     |
| p.Y220C                          | 7%                             | Yes                                  | Damaging                     |
| p.C176F                          | 81%                            | Yes                                  | Damaging                     |
| p.A159P                          | 26%                            | No                                   | Damaging                     |
| p.P36fs                          | 14%                            | Yes*                                 | N/A*                         |
| p.R273L                          | 87%                            | Yes                                  | Damaging                     |
| p.C135R                          | 63%                            | Yes                                  | Damaging                     |
| p.P151T                          | 37%                            | Yes                                  | Damaging                     |
| p.C275Y                          | 67%                            | Yes                                  | Damaging                     |
| p.R273H                          | 71%                            | Yes                                  | Damaging                     |
| p.C238Y                          | 2%                             | Yes                                  | Damaging                     |
| p.E258K                          | 14%                            | Yes                                  | Damaging                     |
| p.R283P                          | 12%                            | Yes                                  | Damaging                     |
| p.I195T                          | 8%                             | Yes                                  | Damaging                     |
| p.P151T                          | 15%                            | Yes                                  | Damaging                     |
| p.R273H                          | 45%                            | Yes                                  | Damaging                     |
| p.Y205C                          | 65%                            | Yes                                  | Damaging                     |
| p.V173M                          | 3%                             | Yes                                  | Damaging                     |
| p.C238Y                          | 80%                            | Yes                                  | Damaging                     |
| p.L43fs                          | 17%                            | Yes*                                 | N/A*                         |
| p.S33_splice                     | 11%                            | No                                   | Unknown                      |

\* Non-identical out-of-frame somatic mutation identified at this position assumed to be damaging.

Supplemental Figure 1: Kaplan-Meier curves for overall survival associated with clinical measures.

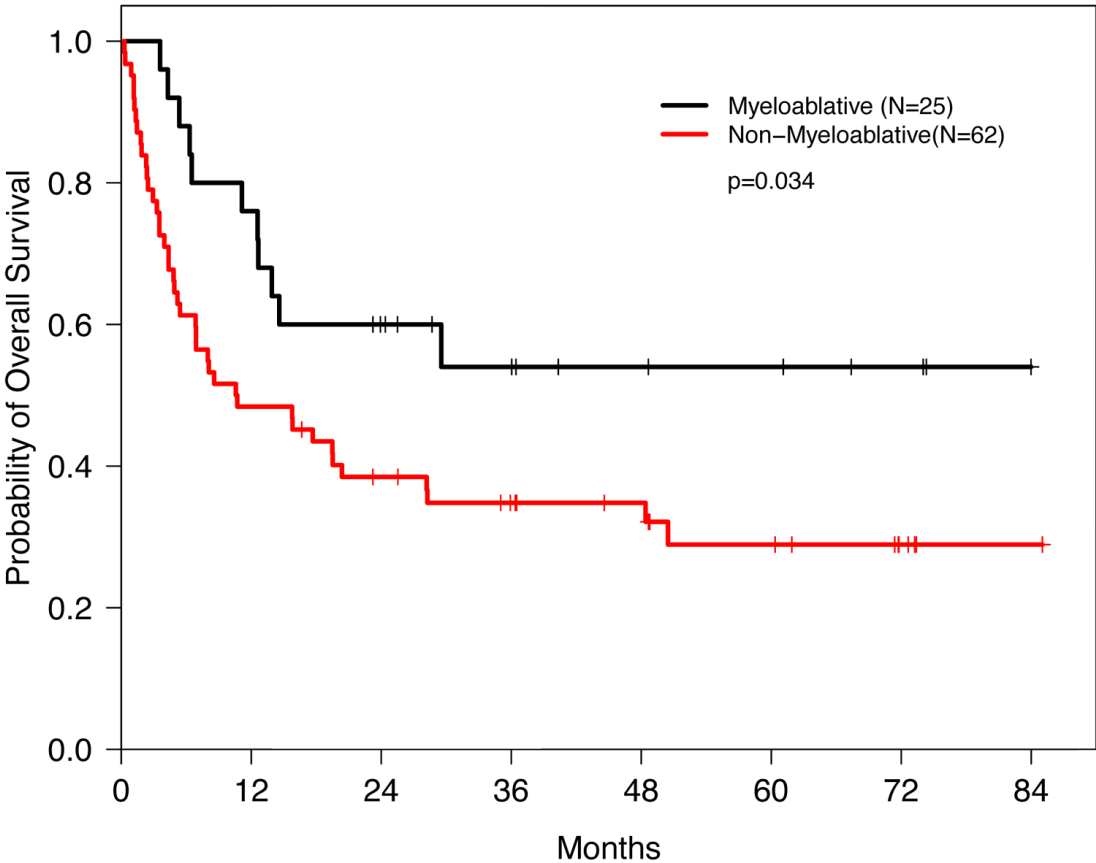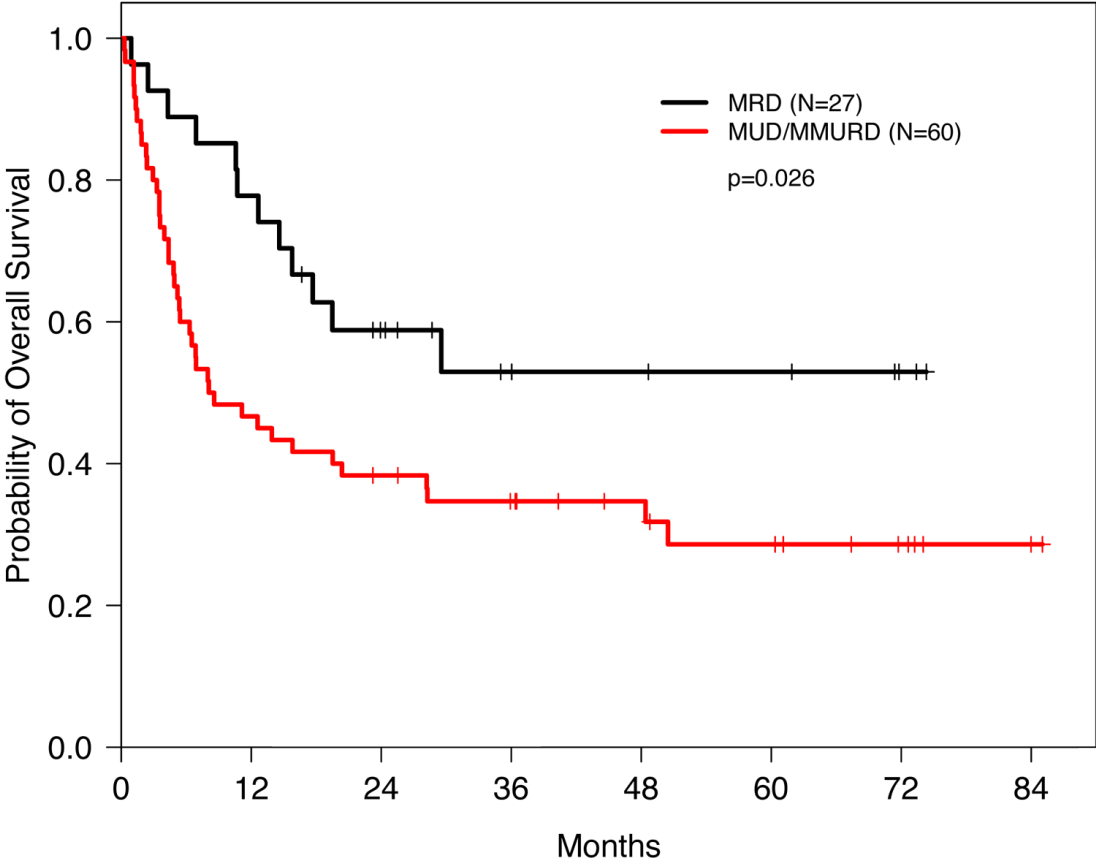



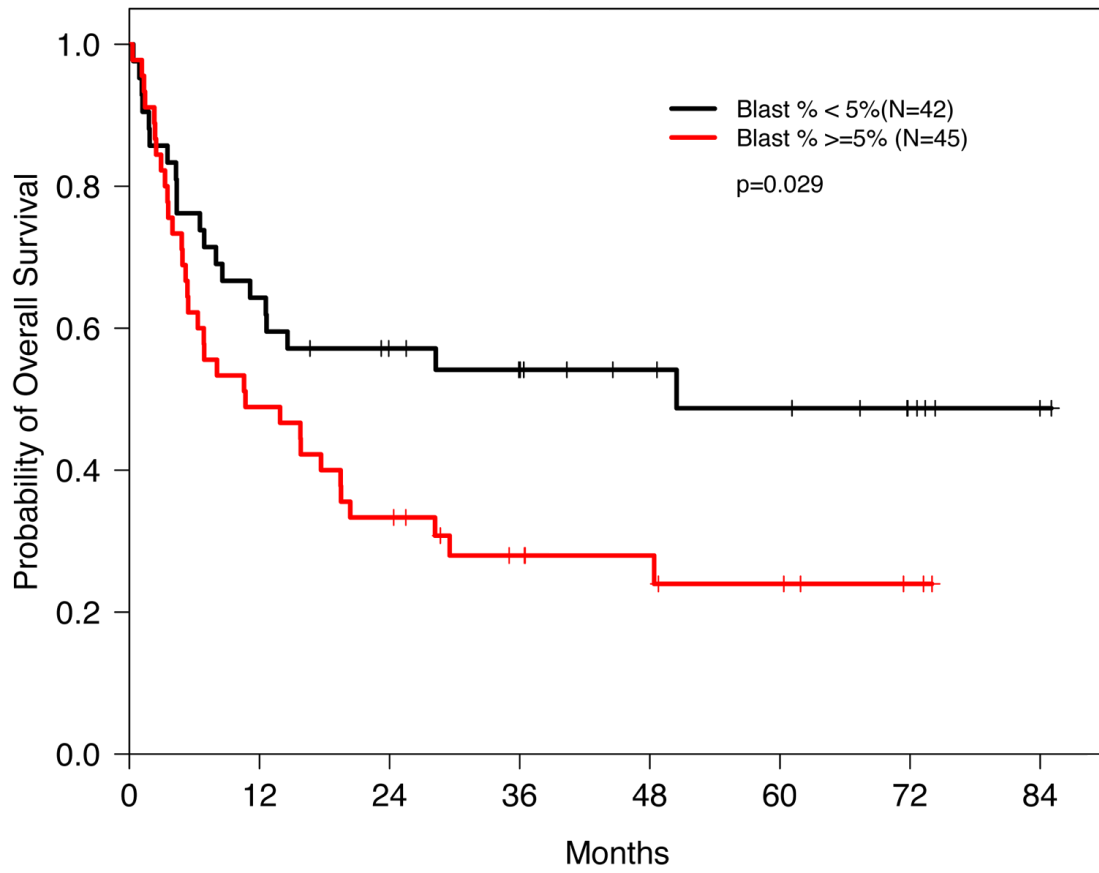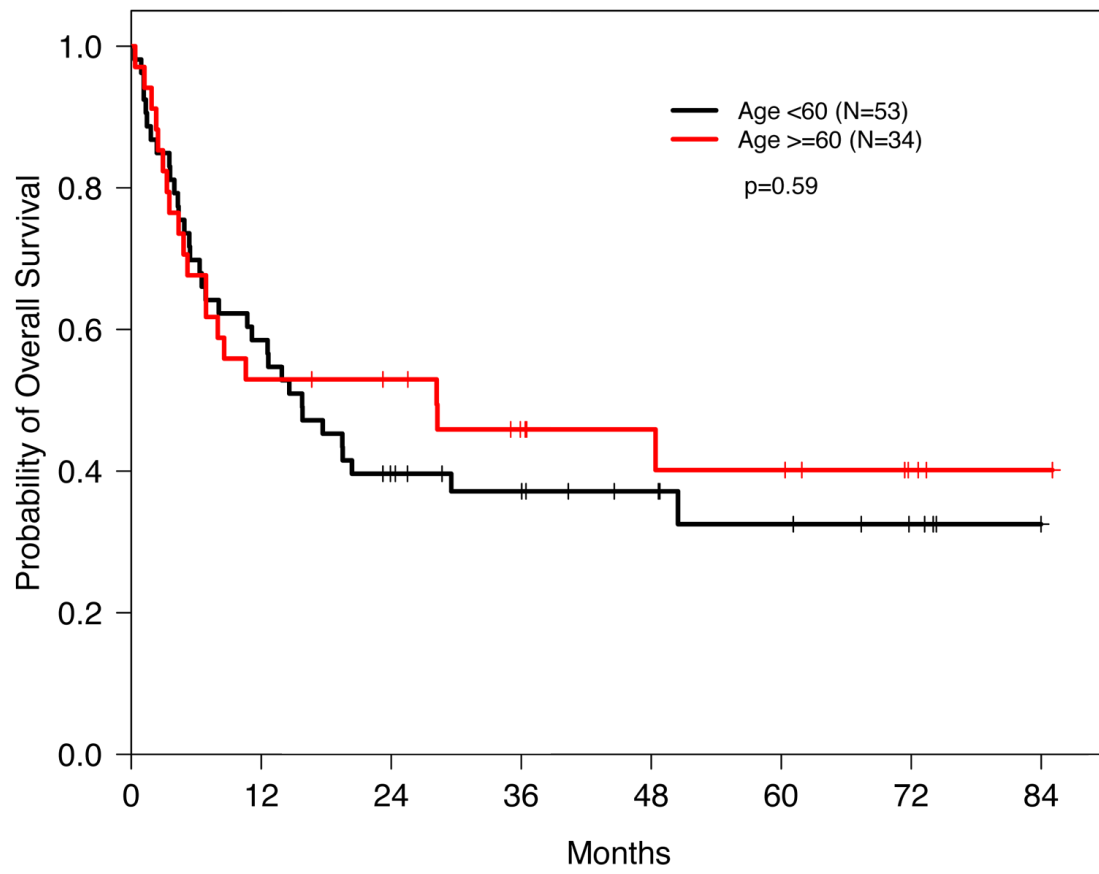

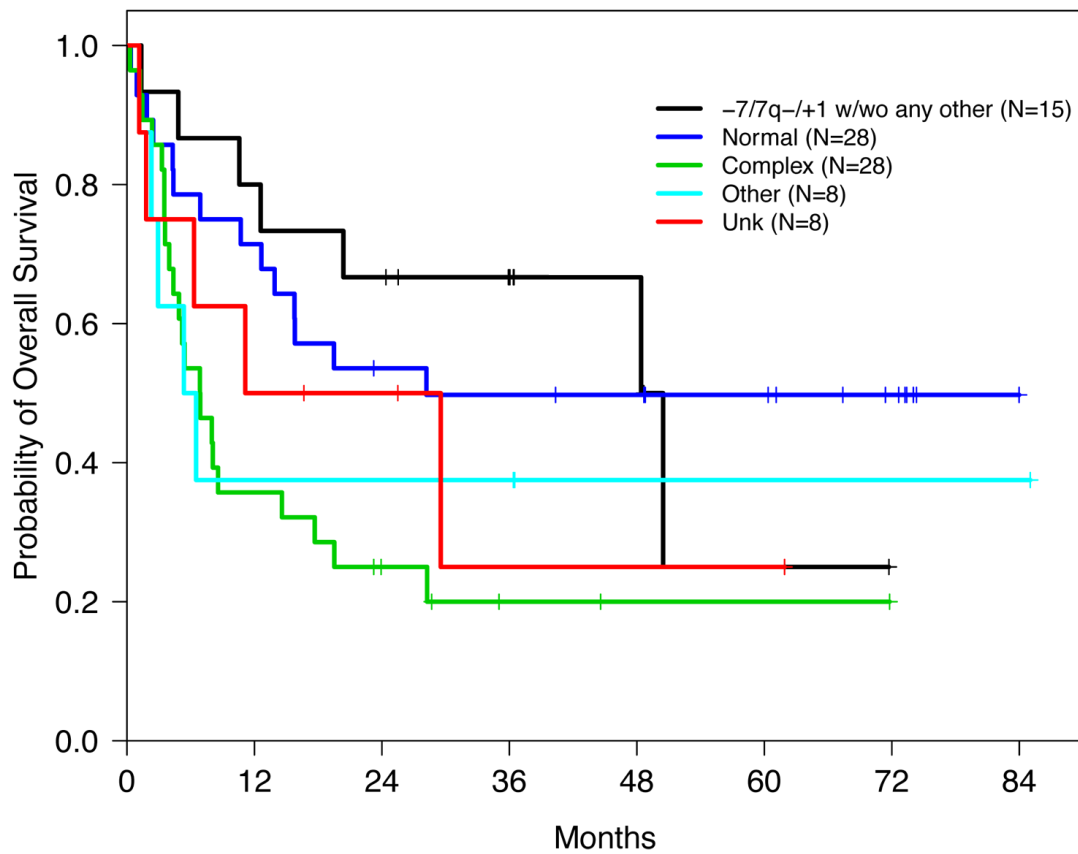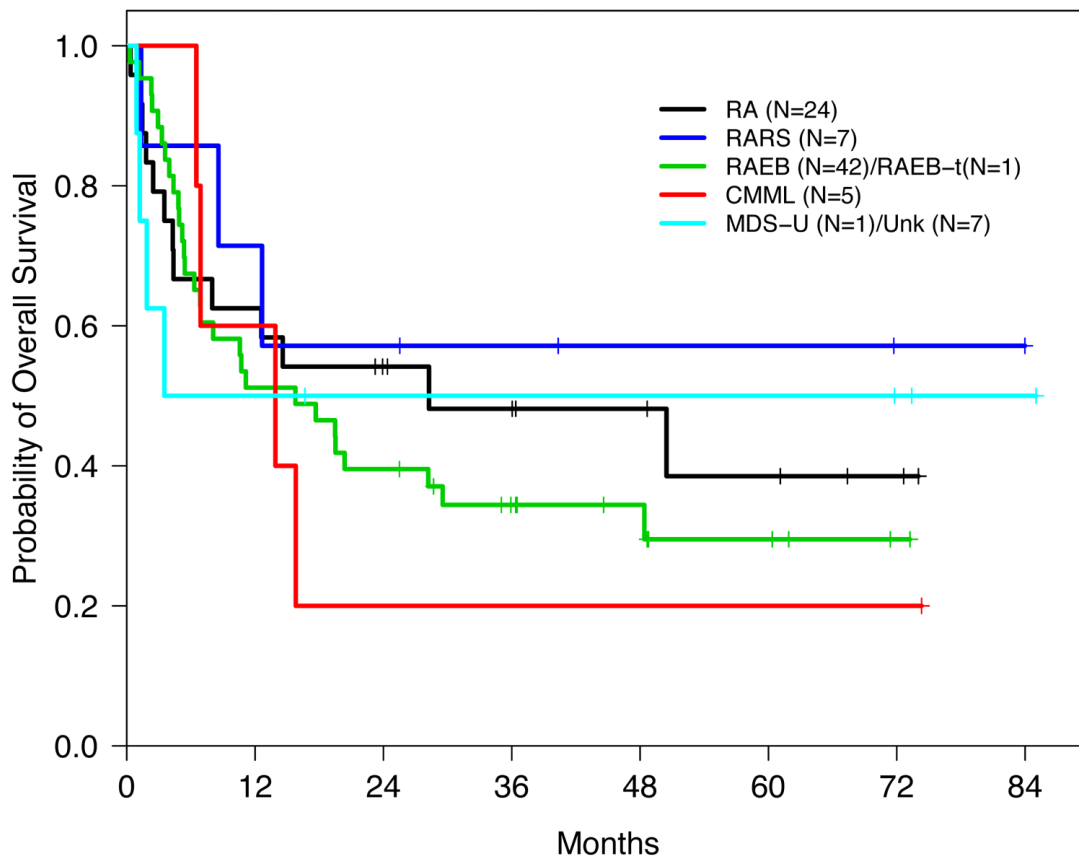

**Supplemental Figure 2:** Kaplan-Meier curves for overall cohort showing overall survival associated with frequently mutated genes.

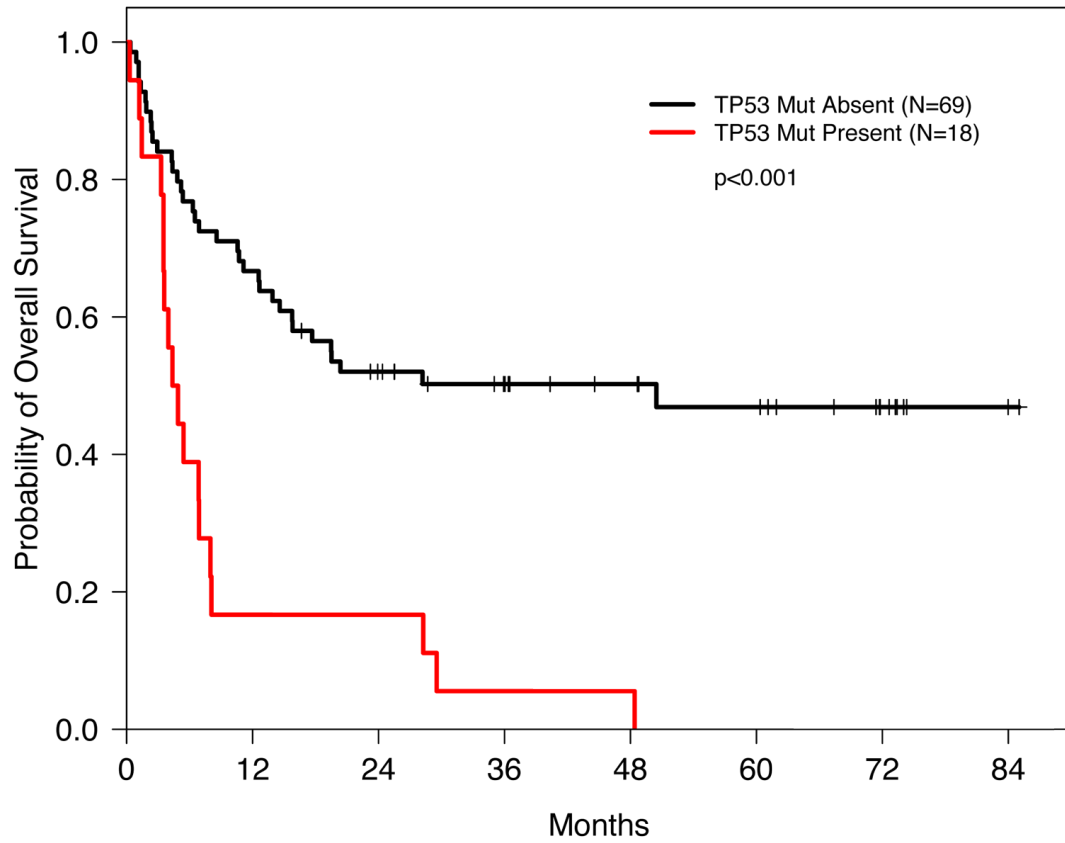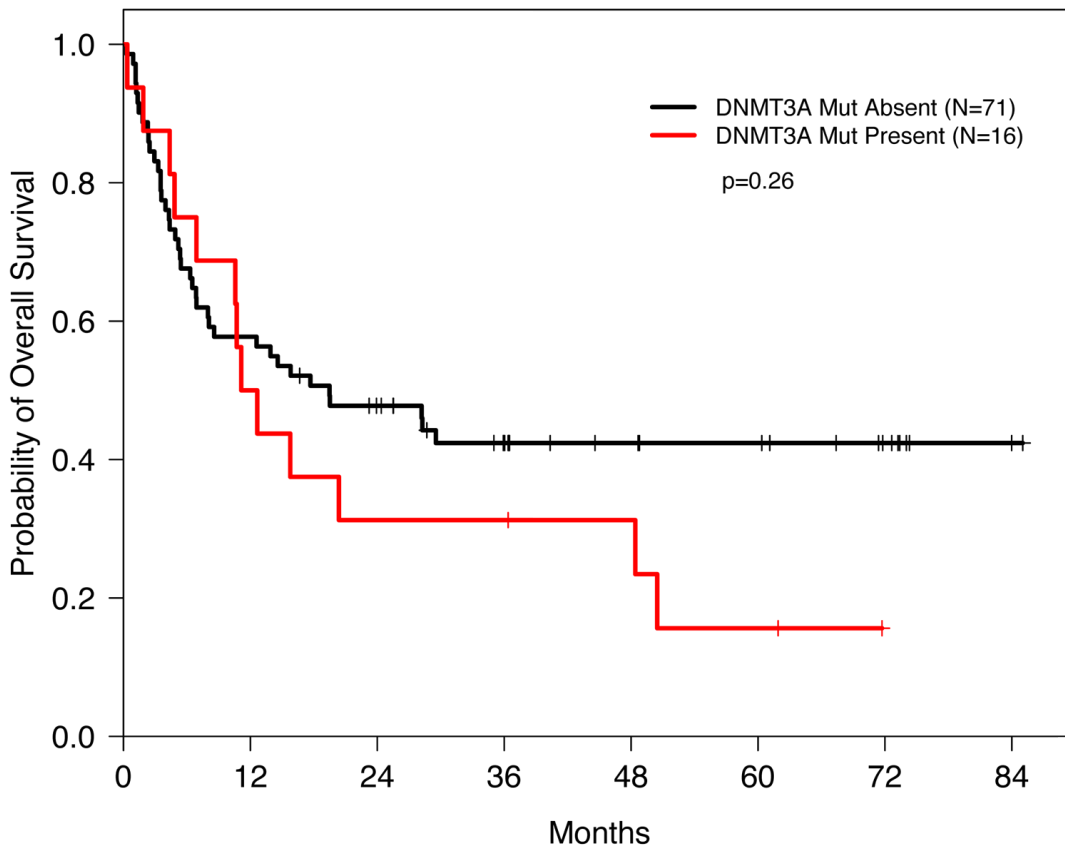

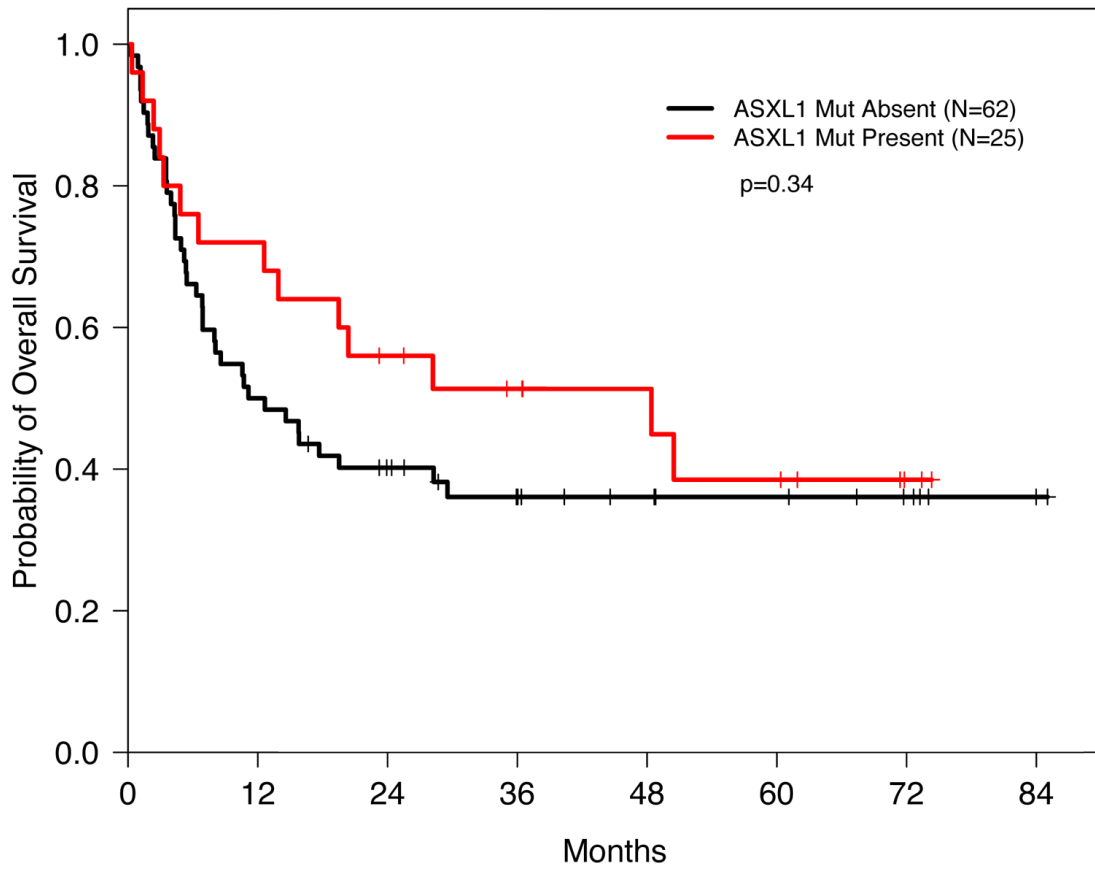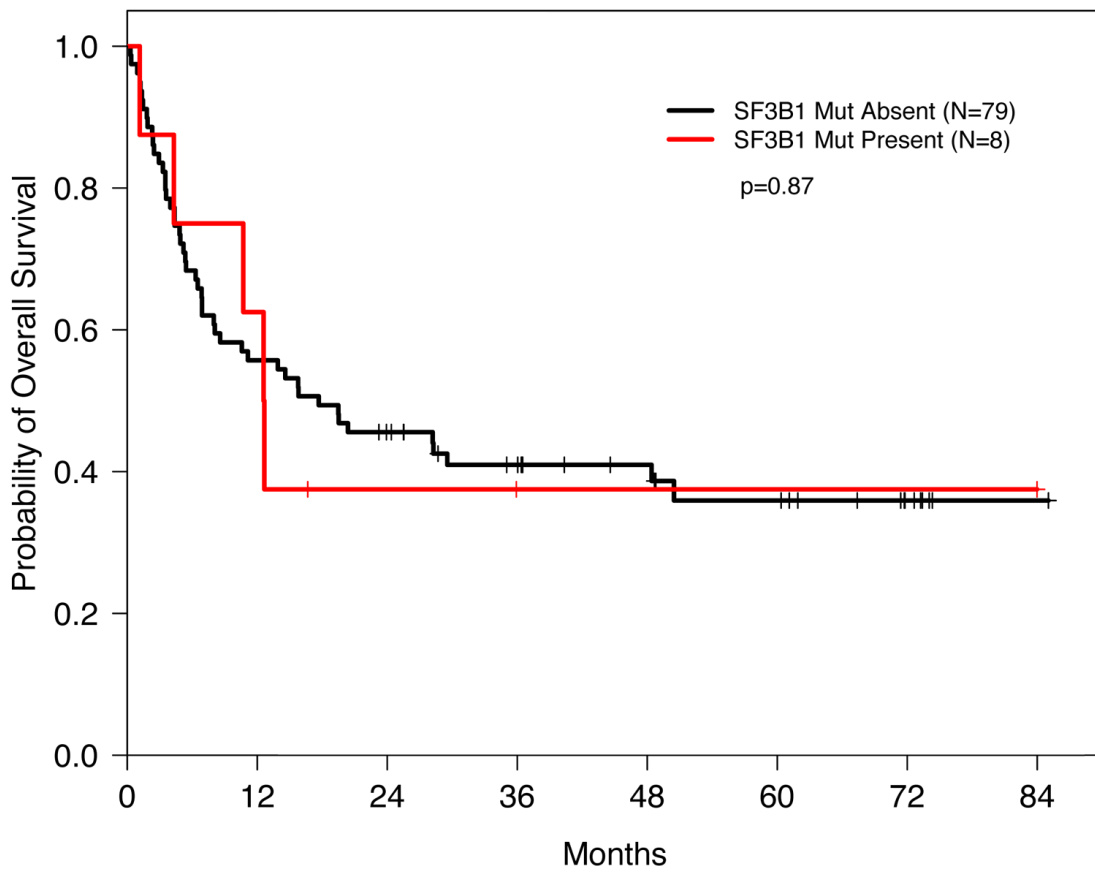

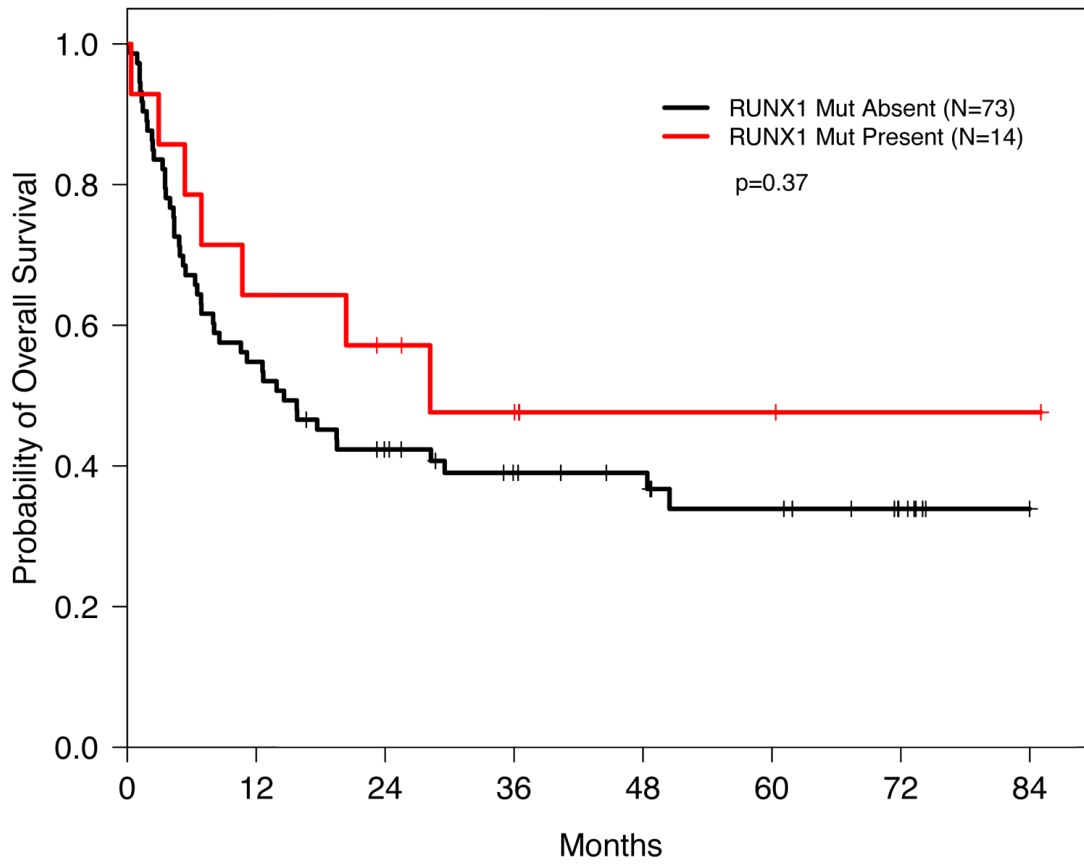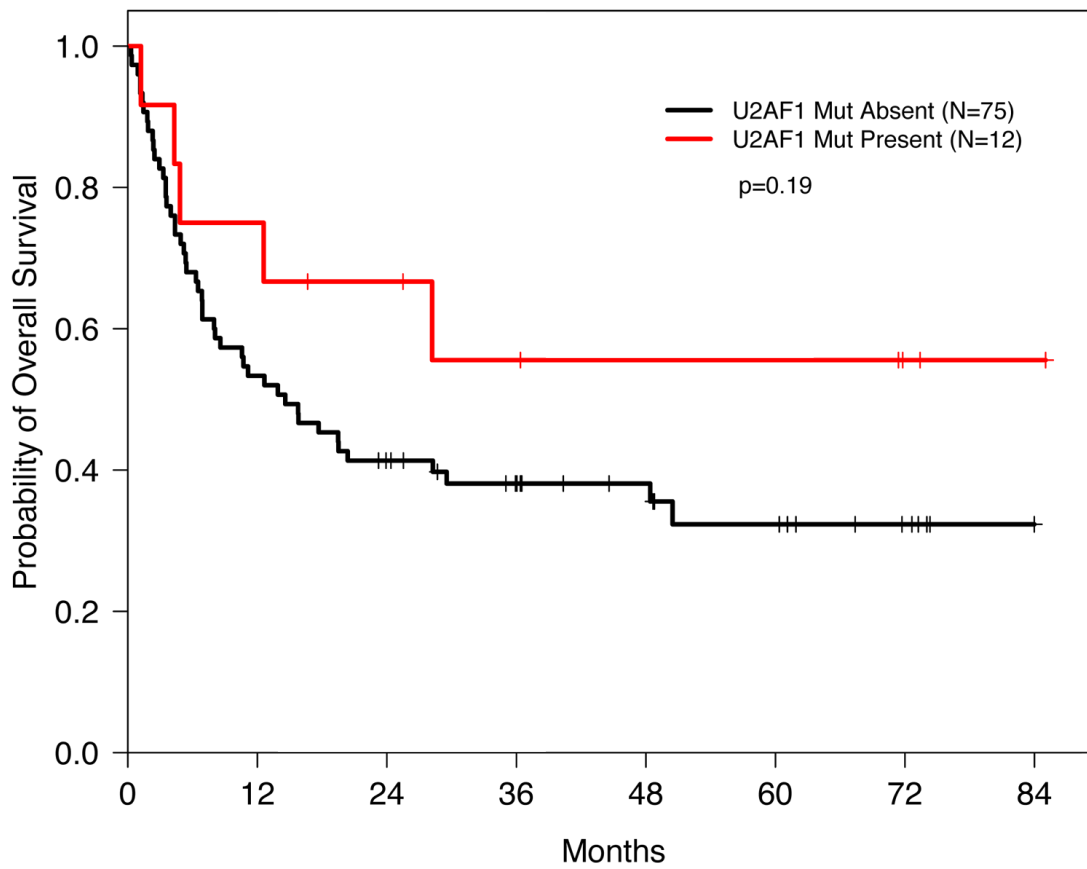

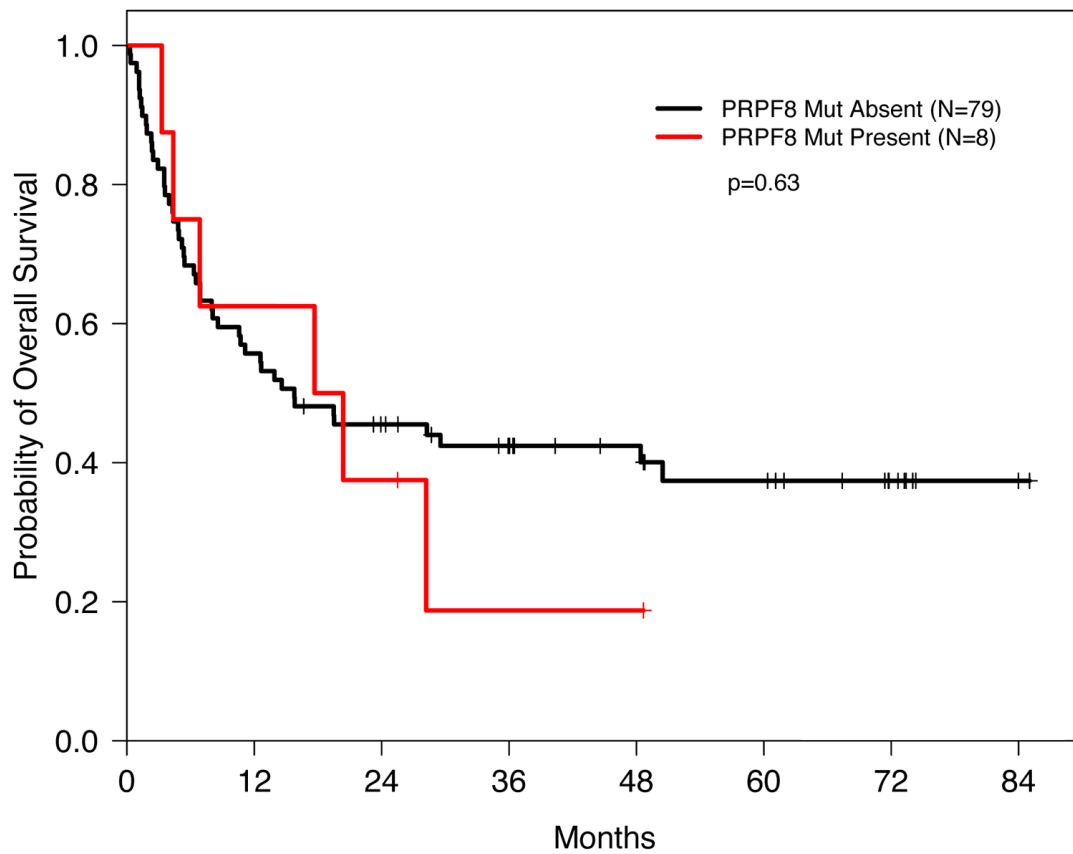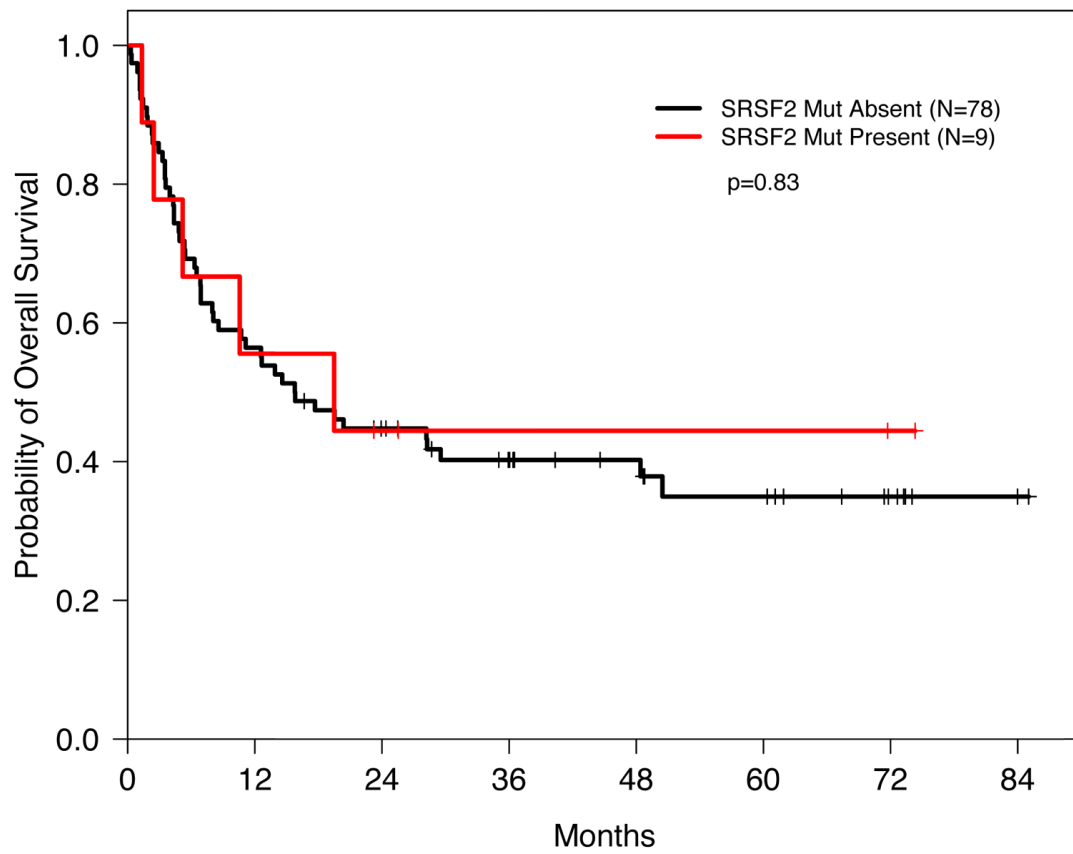

**Supplemental Figure 3:** Kaplan-Meier curves from day 100 landmark analysis showing overall survival associated with frequently mutated genes.

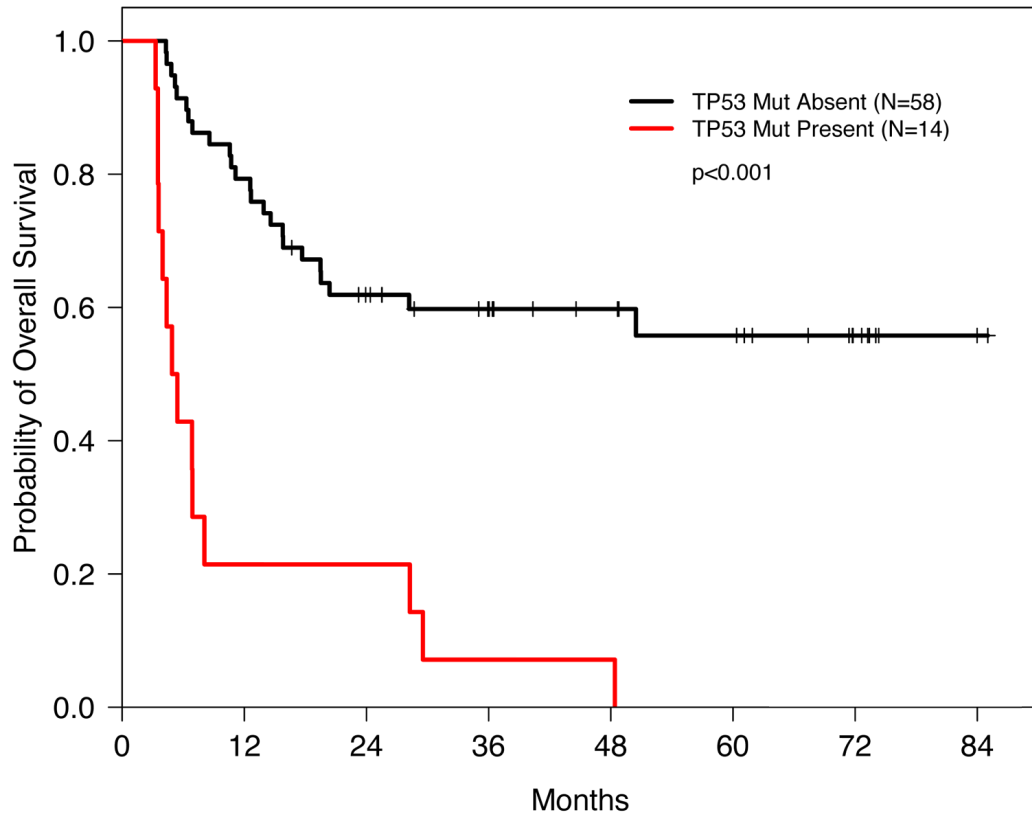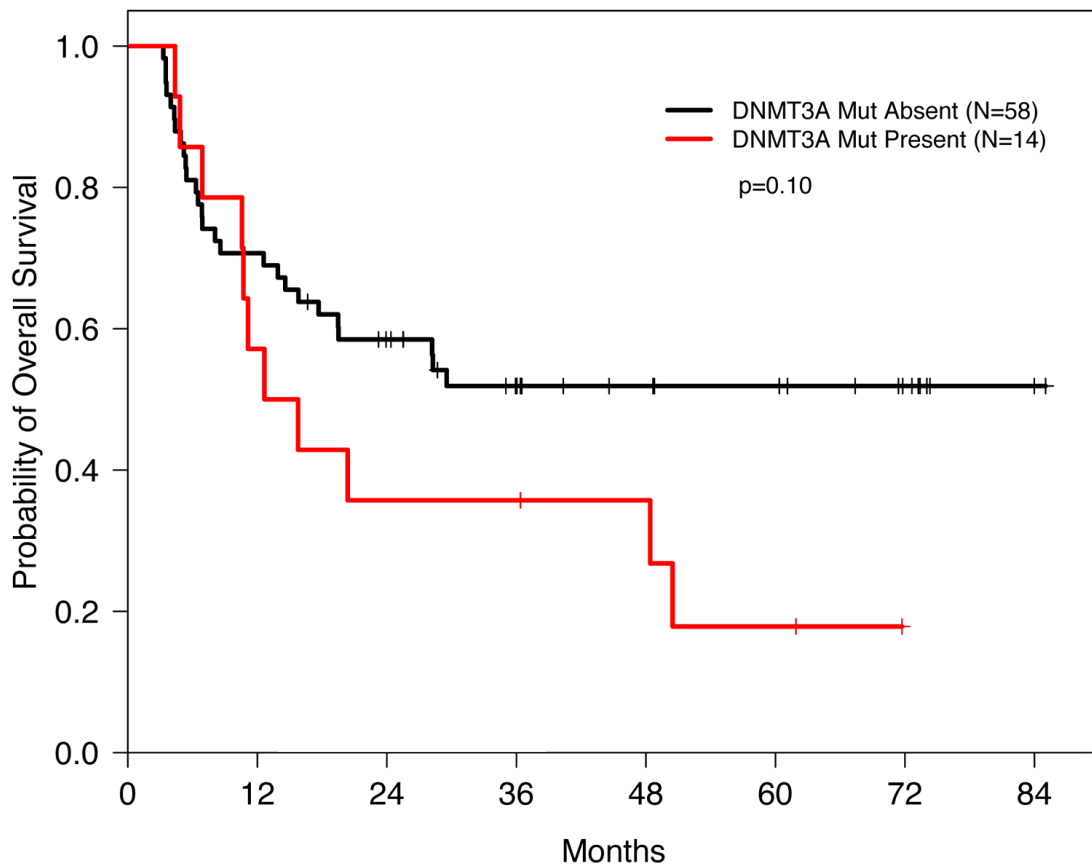

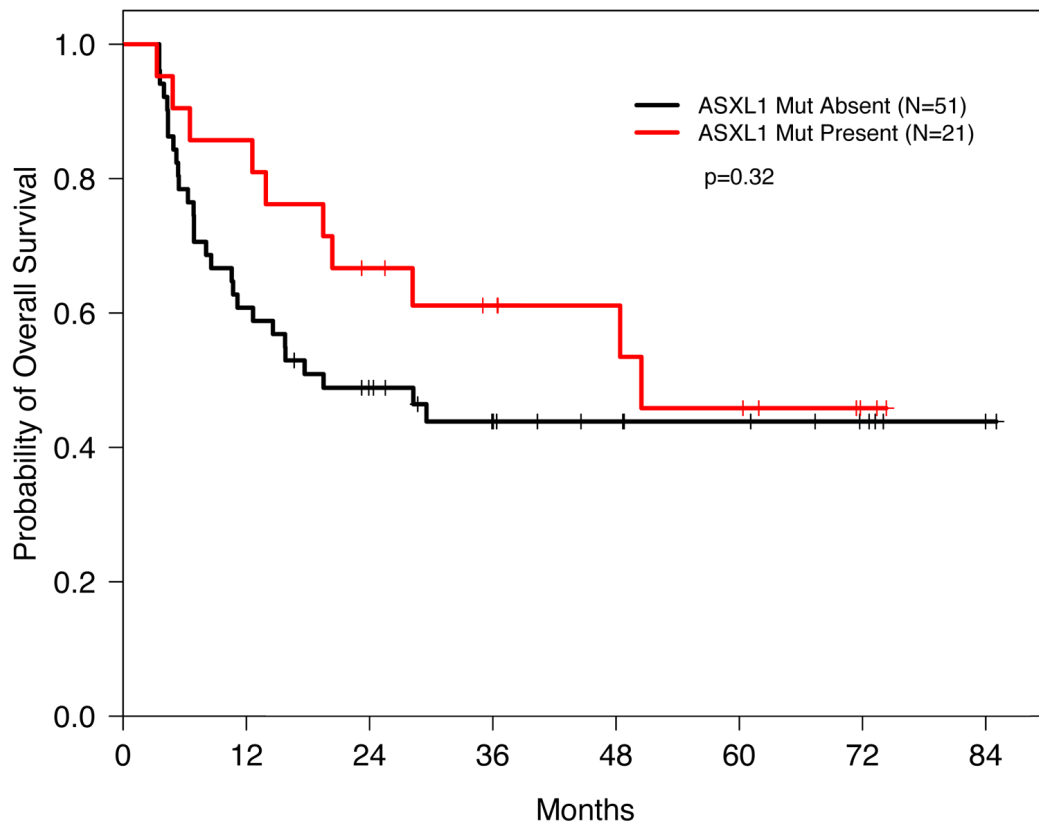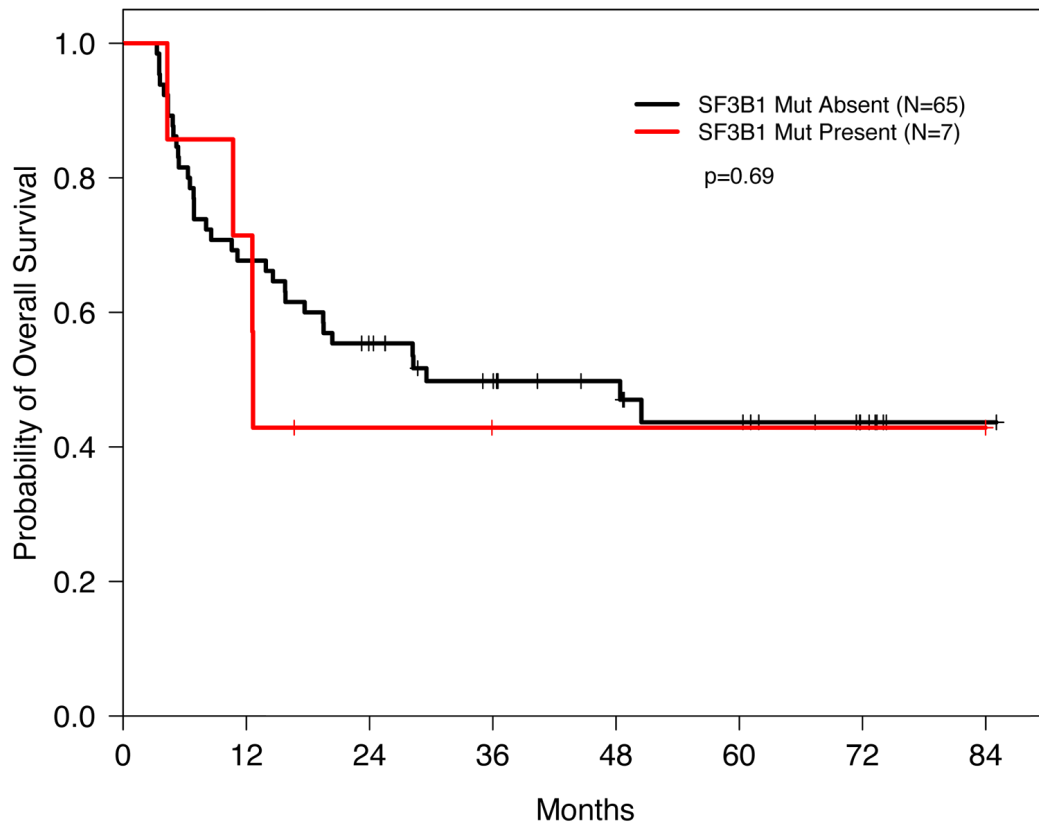



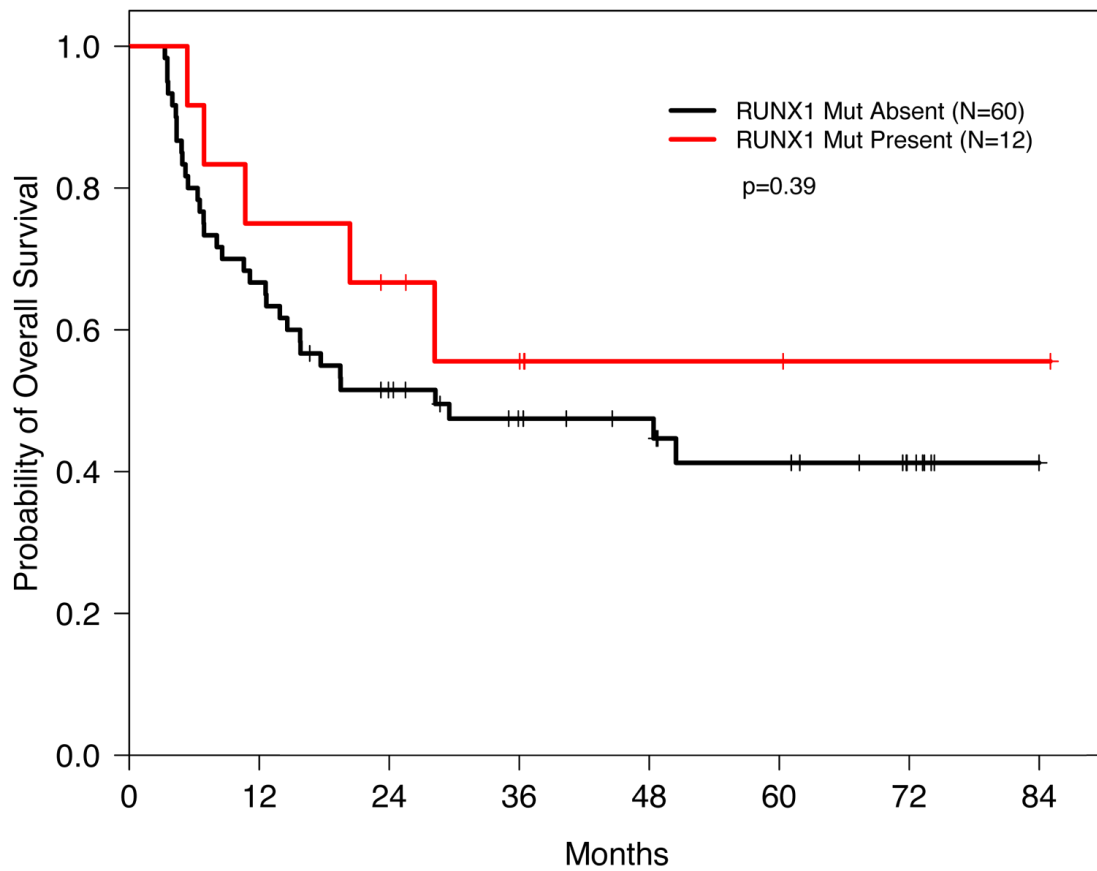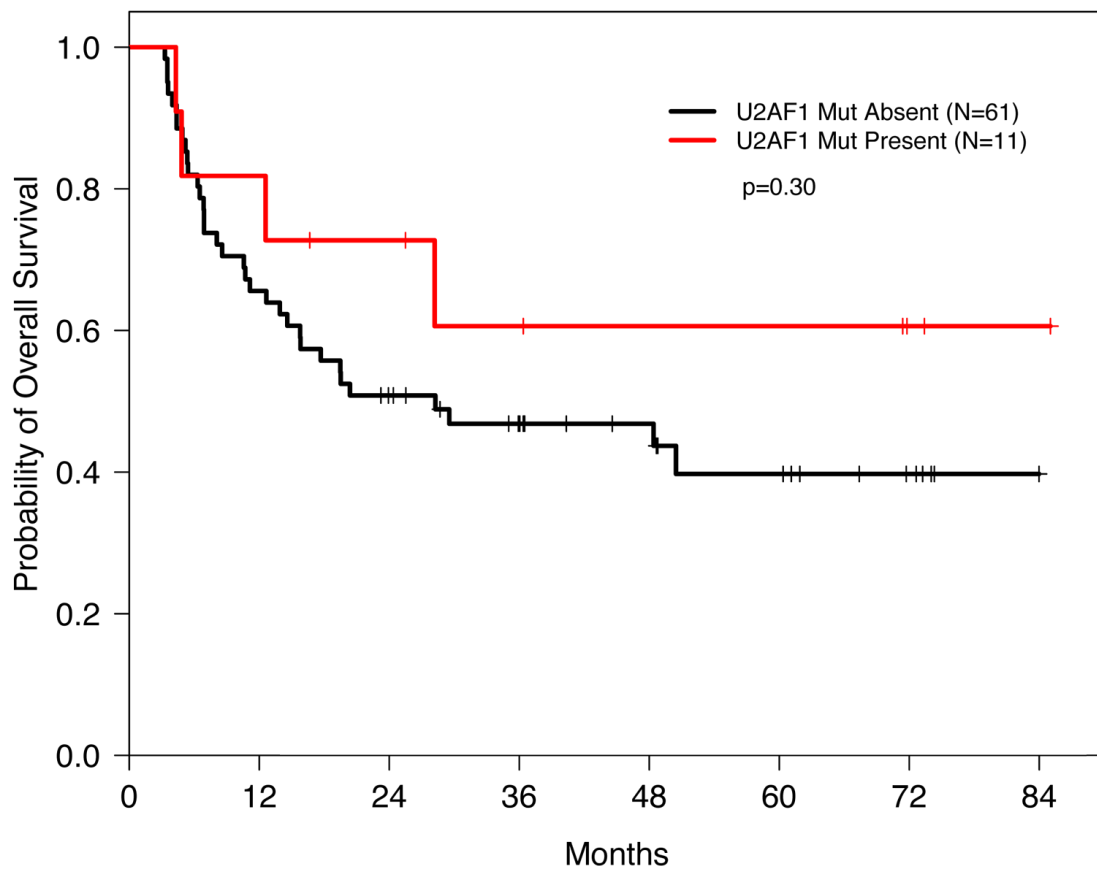

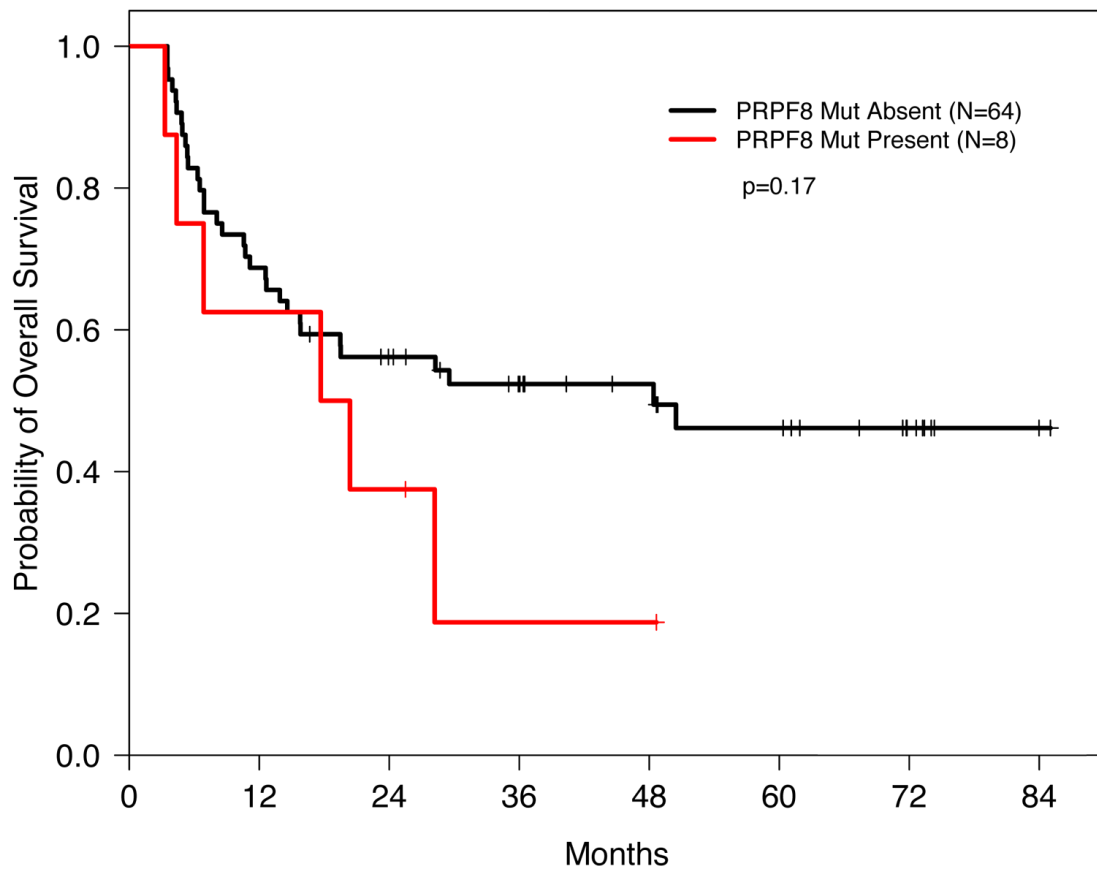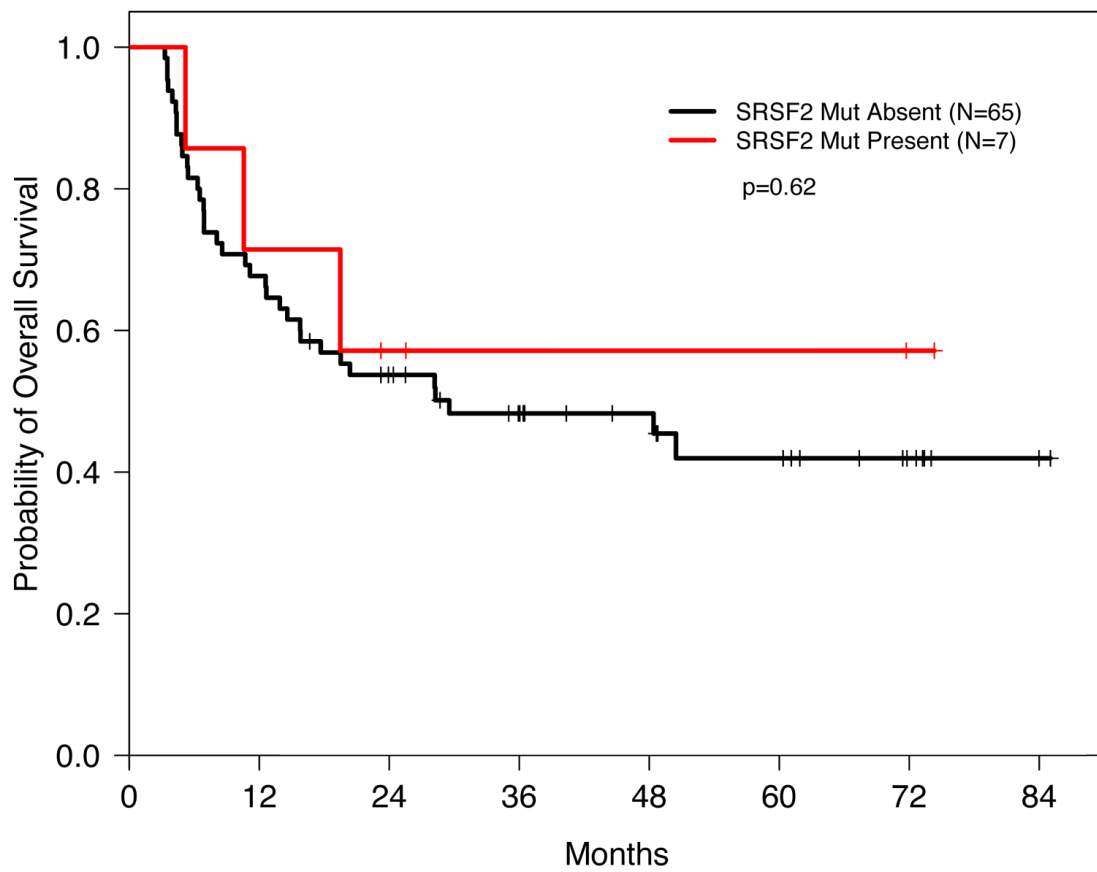

Supplement: supp_JCO.2013.52.3381_DS_JCO.2013.52.3381.pdf [file supp_JCO.2013.52.3381_DS_JCO.2013.52.3381.pdf]
